# Supplementary material for: DFT-calculation of the structural isomers of (1-methyl-4-phenyl-1-azabuta-1,3-diene)tetracarbonyliron(0) and (4-phenyl-1-oxabuta-1,3-diene)tetracarbonyliron(0)
Source: Royal Society of Chemistry journal article supplement (doi:10.1039/b501554e), 2005-01-01
Supplement: b501554e.pdf [file b501554e.pdf]

## **Electronic Supplementary Information**

### **DFT-calculation of the Structures of (1-methyl-4-phenyl-1-azabuta-1,3-diene)tetracarbonyliron(0) and (4-phenyl-1-oxabuta-1,3-diene)tetracarbonyliron(0).**

Timothy N. Danks<sup>a,b,\*</sup>, Gabriele Wagner<sup>a</sup>

<sup>a</sup> Chemistry Division, SBMS, University of Surrey, Guildford, Surrey GU2 7XH, United Kingdom. E-mail: g.wagner@surrey.ac.uk

<sup>b</sup> The Oratory School, Woodcote, Reading, Berkshire, RG8 0PJ, United Kingdom.

### **Content**

1. Colour versions of Figures 1, 2 and 4.
2. Calculated absolute energies and zero point energies of the (1-azabuta-1,3-diene) and (1-oxabuta-1,3-diene)tetracarbonyliron(0) complexes.
3. Z-matrix coordinates of the 1-azabuta-1,3-diene complexes
  - 3.1  $\eta^2$  olefin cisoid
  - 3.2  $\eta^2$  olefin transoid
  - 3.3  $\eta^3$  allyl
  - 3.4  $\eta^3$  C-acyl
  - 3.5  $\eta^2$  N=C cisoid
  - 3.6  $\eta^2$  N=C transoid
  - 3.7  $\sigma^2$  N cisoid
  - 3.8  $\sigma^2$  N transoid
4. Z-matrix coordinates of the 1-oxabuta-1,3-diene complexes
  - 4.1  $\eta^2$  olefin cisoid
  - 4.2  $\eta^2$  olefin transoid
  - 4.3  $\eta^3$  allyl
  - 4.4  $\eta^3$  C-acyl
  - 4.5  $\eta^2$  N=C cisoid
  - 4.6  $\eta^2$  N=C transoid
  - 4.7  $\sigma^2$  N cisoid
  - 4.8  $\sigma^2$  N transoid



1. Colour versions of Figures 1, 2 and 4.

Figure 1 Calculated structures of the (1-methyl-4-phenyl-1-azabuta-1,3-diene)tetracarbonyliron(0) complexes 1-8.

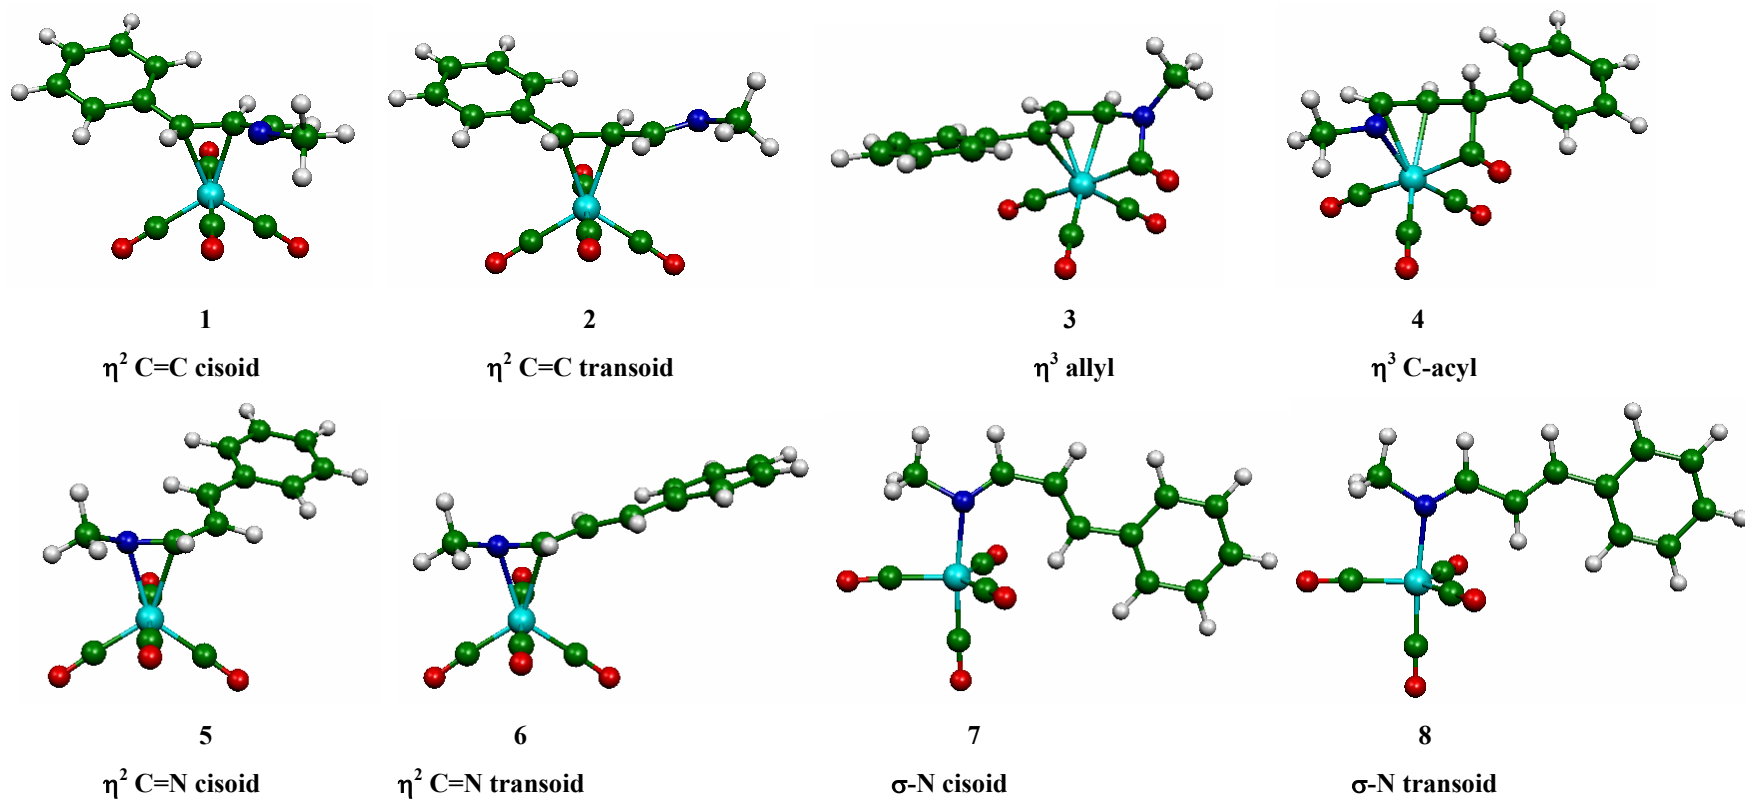

**Figure 2** Calculated structures of the (4-phenyl-1-oxabuta-1,3-diene)tetracarbonyliron(0) complexes **9-16**.

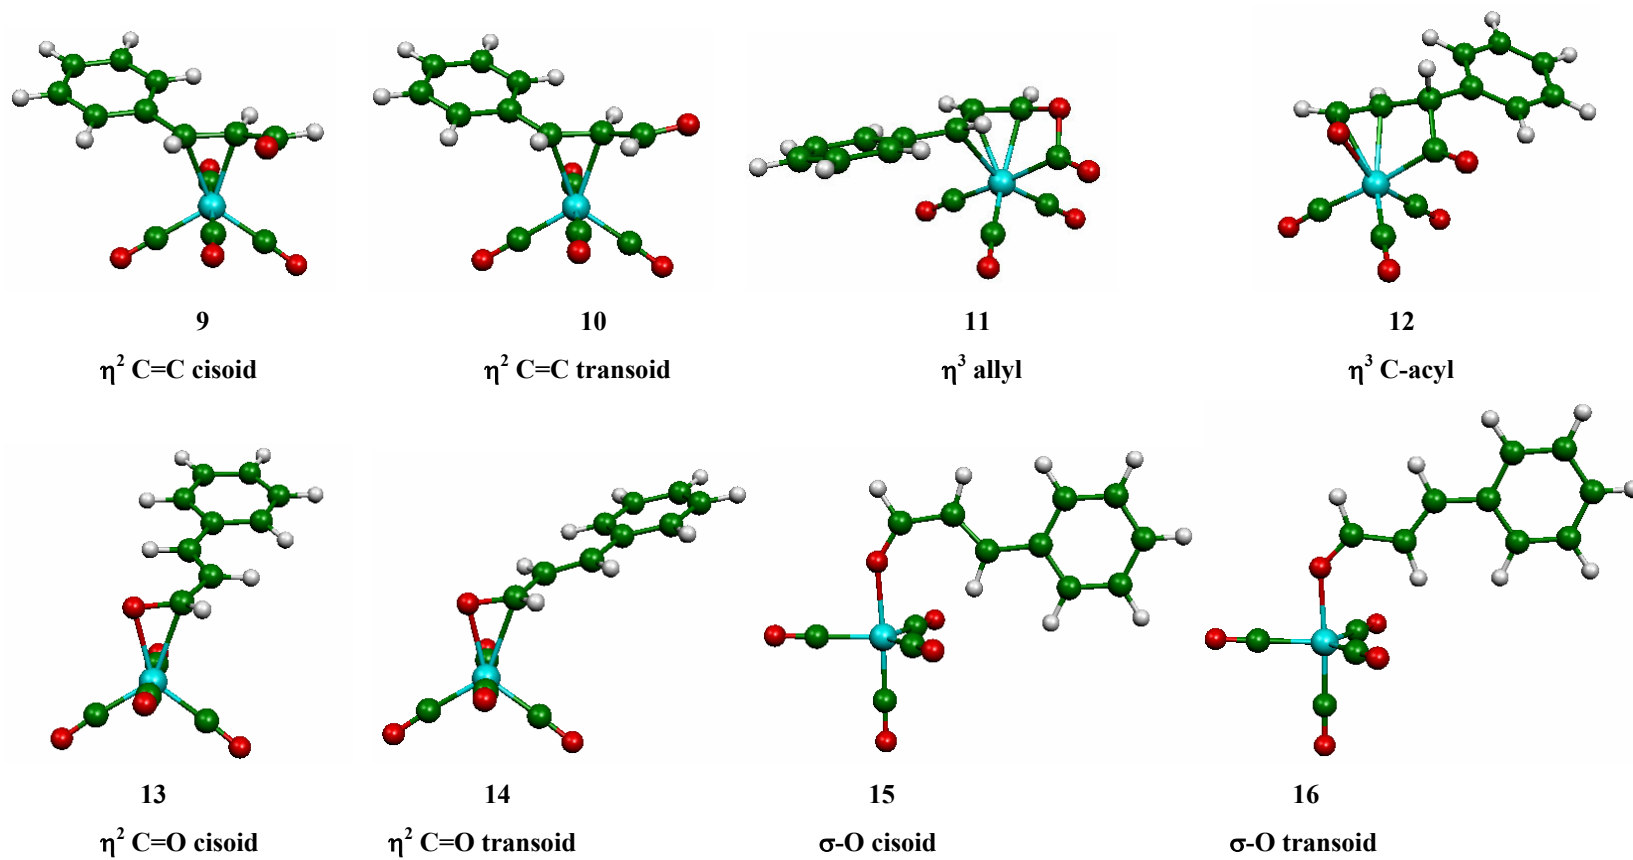

**Figure 4** Relevant orbitals and orbital energies of 1-methyl-4-phenyl-1-azabuta-1,3-diene and 4-phenyl-1-oxabuta-1,3-diene in *transoid* conformation (orbital energies of the corresponding *cisoid* conformation are given in parenthesis).

1-methyl-4-phenyl-1-azabuta-1,3-diene

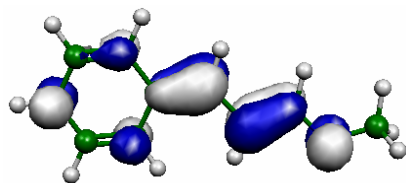

LUMO,  $E = -1.54$  eV ( $-1.59$  eV)

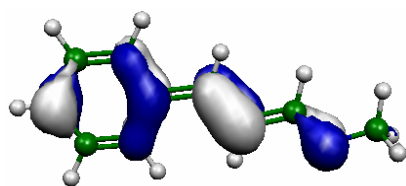

HOMO,  $E = -5.94$  eV ( $-5.85$  eV)

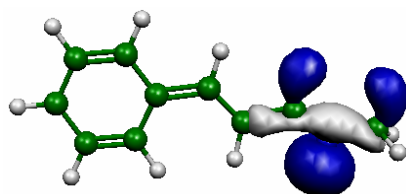

HOMO-1,  $E = -6.74$  eV ( $-6.72$  eV)

4-phenyl-1-oxabuta-1,3-diene

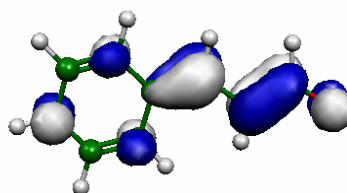

LUMO,  $E = -2.09$  eV ( $-2.12$  eV)

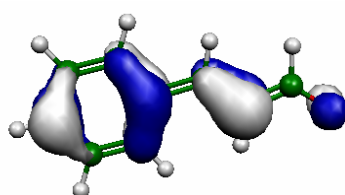

HOMO,  $E = -6.58$  eV ( $-6.47$  eV)

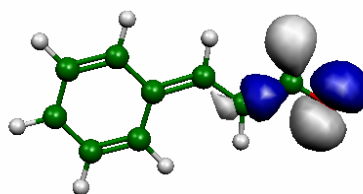

HOMO-1,  $E = -6.74$  eV ( $-6.76$  eV)

**2. Calculated absolute energies and zero point energies of the (1-azabuta-1,3-diene) and (1-oxabuta-1,3-diene)tetracarbonyliron(0) complexes.**

|                             | Gas phase values<br>(B3LYP/LANL2DZ/6-31G*) |                          | PCM single point calculations,<br>$\epsilon = 8.93$ (CH <sub>2</sub> Cl <sub>2</sub> ) |
|-----------------------------|--------------------------------------------|--------------------------|----------------------------------------------------------------------------------------|
|                             | Absolute energy<br>(a.u.)                  | ZPE-correction<br>(a.u.) | Absolute energy (a.u.)                                                                 |
| <b>Ligand 1<sup>a</sup></b> |                                            |                          |                                                                                        |
| $\eta^2$ (C=C) cisoid       | -1019.2267957                              | 0.219855                 | -1019.233815                                                                           |
| $\eta^2$ (C=C) transoid     | -1019.2271899                              | 0.219703                 | -1019.234993                                                                           |
| $\eta^3$ (C=C-C) allyl      | -1019.2271101                              | 0.222446                 | -1019.238952                                                                           |
| $\eta^3$ (N=C-C) C-acyl     | -1019.2026560                              | 0.221294                 | -1019.212763                                                                           |
| $\eta^2$ (C=N) cisoid       | -1019.2169111                              | 0.219680                 | -1019.223679                                                                           |
| $\eta^2$ (C=N) transoid     | -1019.2193954                              | 0.219310                 | -1019.226528                                                                           |
| $\sigma$ -N cisoid          | -1019.2333448                              | 0.221031                 | -1019.243429                                                                           |
| $\sigma$ -N transoid        | -1019.2443459                              | 0.220909                 | -1019.255005                                                                           |
| <b>Ligand 2<sup>a</sup></b> |                                            |                          |                                                                                        |
| $\eta^2$ (C=C) cisoid       | -999.7940696                               | 0.179479                 | -999.8032785                                                                           |
| $\eta^2$ (C=C) transoid     | -999.7928552                               | 0.179435                 | -999.8030563                                                                           |
| $\eta^3$ (C=C-C) allyl      | -999.7782345                               | 0.181750                 | -999.7903995                                                                           |
| $\eta^3$ (O=C-C) C-acyl     | -999.7638468                               | 0.180872                 | -999.774797                                                                            |
| $\eta^2$ (C=O) cisoid       | -999.7836852                               | 0.178989                 | -999.7917758                                                                           |
| $\eta^2$ (C=O) transoid     | -999.7850315                               | 0.178742                 | -999.794685                                                                            |
| $\sigma$ -O cisoid          | -999.7890824                               | 0.179352                 | -999.7992019                                                                           |
| $\sigma$ -O transoid        | -999.7956896                               | 0.179426                 | -999.8088429                                                                           |

<sup>a</sup> 1: 1-methyl-4-phenyl-1-azabuta-1,3-diene; 2: 4-phenyl-1-oxabuta-1,3-diene

**3. Z-matrix coordinates of the 1-azabuta-1,3-diene complexes**

**3.1  $\eta^2$  olefin cisoid**

```

fe
c 1 cfe2
c 1 cfe3          2 cfec3
c 1 cfe4          3 cfec4          2 dih4
c 1 cfe5          4 cfec5          3 dih5
o 2 oc6          1 ocfe6          5 dih6
    
```

|        |    |      |          |        |    |       |
|--------|----|------|----------|--------|----|-------|
| o      | 3  | oc7  | 1        | ocfe7  | 5  | dih7  |
| o      | 4  | oc8  | 1        | ocfe8  | 5  | dih8  |
| o      | 5  | oc9  | 1        | ocfe9  | 2  | dih9  |
| c      | 7  | co10 | 3        | coc10  | 1  | dih10 |
| n      | 10 | nc11 | 7        | ncol11 | 3  | dih11 |
| c      | 11 | cn12 | 10       | cnc12  | 7  | dih12 |
| c      | 12 | cc13 | 11       | ccn13  | 10 | dih13 |
| c      | 13 | cc14 | 12       | ccc14  | 11 | dih14 |
| c      | 14 | cc15 | 13       | ccc15  | 12 | dih15 |
| c      | 15 | cc16 | 14       | ccc16  | 13 | dih16 |
| c      | 16 | cc17 | 15       | ccc17  | 14 | dih17 |
| c      | 17 | cc18 | 16       | ccc18  | 15 | dih18 |
| c      | 18 | cc19 | 17       | ccc19  | 16 | dih19 |
| c      | 19 | cc20 | 18       | ccc20  | 17 | dih20 |
| h      | 10 | hc21 | 11       | hcn21  | 12 | dih21 |
| h      | 10 | hc22 | 11       | hcn22  | 12 | dih22 |
| h      | 10 | hc23 | 11       | hcn23  | 12 | dih23 |
| h      | 12 | hc24 | 13       | hcc24  | 14 | dih24 |
| h      | 13 | hc25 | 14       | hcc25  | 15 | dih25 |
| h      | 14 | hc26 | 15       | hcc26  | 20 | dih26 |
| h      | 16 | hc27 | 15       | hcc27  | 20 | dih27 |
| h      | 17 | hc28 | 16       | hcc28  | 15 | dih28 |
| h      | 18 | hc29 | 19       | hcc29  | 20 | dih29 |
| h      | 19 | hc30 | 20       | hcc30  | 15 | dih30 |
| h      | 20 | hc31 | 19       | hcc31  | 18 | dih31 |
| cfe2   |    |      | 1.817314 |        |    |       |
| cfe3   |    |      | 1.828171 |        |    |       |
| cfec3  |    |      | 179.776  |        |    |       |
| cfe4   |    |      | 1.791578 |        |    |       |
| cfec4  |    |      | 89.548   |        |    |       |
| dih4   |    |      | -37.547  |        |    |       |
| cfe5   |    |      | 1.792594 |        |    |       |
| cfec5  |    |      | 113.681  |        |    |       |
| dih5   |    |      | 90.018   |        |    |       |
| oc6    |    |      | 1.147456 |        |    |       |
| ocfe6  |    |      | 178.299  |        |    |       |
| dih6   |    |      | 12.174   |        |    |       |
| oc7    |    |      | 1.145975 |        |    |       |
| ocfe7  |    |      | 176.580  |        |    |       |
| dih7   |    |      | -71.897  |        |    |       |
| oc8    |    |      | 1.152052 |        |    |       |
| ocfe8  |    |      | 179.005  |        |    |       |
| dih8   |    |      | -36.466  |        |    |       |
| oc9    |    |      | 1.152928 |        |    |       |
| ocfe9  |    |      | 178.009  |        |    |       |
| dih9   |    |      | -97.430  |        |    |       |
| co10   |    |      | 3.862419 |        |    |       |
| coc10  |    |      | 89.106   |        |    |       |
| dih10  |    |      | 159.655  |        |    |       |
| nc11   |    |      | 1.449280 |        |    |       |
| ncol11 |    |      | 52.673   |        |    |       |
| dih11  |    |      | 33.763   |        |    |       |

|       |          |
|-------|----------|
| cn12  | 1.273911 |
| cnc12 | 118.144  |
| dih12 | -105.599 |
| cc13  | 1.477207 |
| ccn13 | 123.269  |
| dih13 | 179.536  |
| cc14  | 1.410001 |
| ccc14 | 123.074  |
| dih14 | -2.430   |
| cc15  | 1.481489 |
| ccc15 | 126.486  |
| dih15 | 146.584  |
| cc16  | 1.406987 |
| ccc16 | 118.675  |
| dih16 | 178.633  |
| cc17  | 1.391926 |
| ccc17 | 121.238  |
| dih17 | 178.703  |
| cc18  | 1.397244 |
| ccc18 | 120.140  |
| dih18 | -0.211   |
| cc19  | 1.395745 |
| ccc19 | 119.370  |
| dih19 | -0.488   |
| cc20  | 1.394459 |
| ccc20 | 120.446  |
| dih20 | 0.361    |
| hc21  | 1.103342 |
| hcn21 | 113.809  |
| dih21 | 1.615    |
| hc22  | 1.097163 |
| hcn22 | 109.289  |
| dih22 | -120.012 |
| hc23  | 1.096772 |
| hcn23 | 109.353  |
| dih23 | 123.381  |
| hc24  | 1.103728 |
| hcc24 | 115.037  |
| dih24 | 178.250  |
| hc25  | 1.087285 |
| hcc25 | 119.313  |
| dih25 | -7.756   |
| hc26  | 1.086732 |
| hcc26 | 113.557  |
| dih26 | 150.727  |
| hc27  | 1.087710 |
| hcc27 | 118.999  |
| dih27 | -179.405 |
| hc28  | 1.086723 |
| hcc28 | 119.697  |
| dih28 | 179.934  |
| hc29  | 1.086437 |



|       |          |
|-------|----------|
| hcc29 | 120.285  |
| dih29 | 179.793  |
| hc30  | 1.086814 |
| hcc30 | 119.488  |
| dih30 | 179.844  |
| hc31  | 1.086144 |
| hcc31 | 119.052  |
| dih31 | -178.389 |

### 3.2 $\eta^2$ olefin transoid

|        |          |          |          |
|--------|----------|----------|----------|
| fe     |          |          |          |
| c      | 1 cfe2   |          |          |
| c      | 1 cfe3   | 2 cfec3  |          |
| c      | 1 cfe4   | 3 cfec4  | 2 dih4   |
| c      | 1 cfe5   | 4 cfec5  | 3 dih5   |
| o      | 2 oc6    | 1 ocfe6  | 5 dih6   |
| o      | 3 oc7    | 1 ocfe7  | 5 dih7   |
| o      | 4 oc8    | 1 ocfe8  | 5 dih8   |
| o      | 5 oc9    | 1 ocfe9  | 2 dih9   |
| c      | 3 cc10   | 1 ccfe10 | 5 dih10  |
| n      | 10 nc11  | 3 ncc11  | 1 dih11  |
| c      | 11 cn12  | 10 cnc12 | 3 dih12  |
| c      | 12 cc13  | 11 ccn13 | 10 dih13 |
| c      | 13 cc14  | 12 ccc14 | 11 dih14 |
| c      | 14 cc15  | 13 ccc15 | 12 dih15 |
| c      | 15 cc16  | 14 ccc16 | 13 dih16 |
| c      | 16 cc17  | 15 ccc17 | 14 dih17 |
| c      | 17 cc18  | 16 ccc18 | 15 dih18 |
| c      | 18 cc19  | 17 ccc19 | 16 dih19 |
| c      | 19 cc20  | 18 ccc20 | 17 dih20 |
| h      | 10 hc21  | 11 hcn21 | 12 dih21 |
| h      | 10 hc22  | 11 hcn22 | 12 dih22 |
| h      | 10 hc23  | 11 hcn23 | 12 dih23 |
| h      | 12 hc24  | 13 hcc24 | 14 dih24 |
| h      | 13 hc25  | 14 hcc25 | 15 dih25 |
| h      | 14 hc26  | 15 hcc26 | 20 dih26 |
| h      | 16 hc27  | 15 hcc27 | 20 dih27 |
| h      | 17 hc28  | 16 hcc28 | 15 dih28 |
| h      | 18 hc29  | 19 hcc29 | 20 dih29 |
| h      | 19 hc30  | 20 hcc30 | 15 dih30 |
| h      | 20 hc31  | 19 hcc31 | 18 dih31 |
| cfe2=  | 1.819515 |          |          |
| cfe3=  | 1.816436 |          |          |
| cfec3= | 179.646  |          |          |
| cfe4=  | 1.790802 |          |          |
| cfec4= | 89.583   |          |          |
| dih4=  | -74.577  |          |          |
| cfe5=  | 1.795071 |          |          |
| cfec5= | 114.018  |          |          |
| dih5=  | 90.397   |          |          |
| oc6=   | 1.147041 |          |          |

|         |          |
|---------|----------|
| ocfe6=  | 178.389  |
| dih6=   | 21.507   |
| oc7=    | 1.149130 |
| ocfe7=  | 177.752  |
| dih7=   | -98.714  |
| oc8=    | 1.152263 |
| ocfe8=  | 178.658  |
| dih8=   | -23.113  |
| oc9=    | 1.151519 |
| ocfe9=  | 178.186  |
| dih9=   | -106.515 |
| cc10=   | 4.809208 |
| ccfe10= | 89.133   |
| dih10=  | 72.232   |
| nc11=   | 1.449197 |
| ncc11=  | 52.833   |
| dih11=  | 15.075   |
| cn12=   | 1.273843 |
| cnc12=  | 117.947  |
| dih12=  | 30.589   |
| cc13=   | 1.468813 |
| ccn13=  | 121.685  |
| dih13=  | 179.001  |
| cc14=   | 1.412153 |
| ccc14=  | 122.427  |
| dih14=  | -162.797 |
| cc15=   | 1.481932 |
| ccc15=  | 126.386  |
| dih15=  | 146.249  |
| cc16=   | 1.406724 |
| ccc16=  | 118.776  |
| dih16=  | -179.285 |
| cc17=   | 1.392033 |
| ccc17=  | 121.198  |
| dih17=  | 178.552  |
| cc18=   | 1.397061 |
| ccc18=  | 120.146  |
| dih18=  | -0.207   |
| cc19=   | 1.395817 |
| ccc19=  | 119.362  |
| dih19=  | -0.435   |
| cc20=   | 1.394187 |
| ccc20=  | 120.474  |
| dih20=  | 0.323    |
| hc21=   | 1.096908 |
| hcn21=  | 109.317  |
| dih21=  | -123.144 |
| hc22=   | 1.103540 |
| hcn22=  | 113.970  |
| dih22=  | -1.366   |
| hc23=   | 1.097305 |
| hcn23=  | 109.230  |

dih23= 120.369  
hc24= 1.105022  
hcc24= 116.493  
dih24= 15.727  
hc25= 1.086343  
hcc25= 119.890  
dih25= -7.034  
hc26= 1.088856  
hcc26= 112.619  
dih26= 152.544  
hc27= 1.087986  
hcc27= 119.120  
dih27= -179.429  
hc28= 1.086675  
hcc28= 119.684  
dih28= 179.894  
hc29= 1.086396  
hcc29= 120.317  
dih29= 179.786  
hc30= 1.086687  
hcc30= 119.417  
dih30= 179.841  
hc31= 1.085746  
hcc31= 119.074  
dih31= -178.471

### 3.3 $\eta^3$ allyl

fe  
c 1 cfe2  
c 1 cfe3 2 cfec3  
c 1 cfe4 2 cfec4 3 dih4  
c 1 cfe5 2 cfec5 3 dih5  
o 2 oc6 1 ocfe6 4 dih6  
o 3 oc7 1 ocfe7 4 dih7  
o 4 oc8 1 ocfe8 5 dih8  
o 5 oc9 1 ocfe9 4 dih9  
c 3 cc10 1 ccfe10 4 dih10  
n 10 nc11 3 ncc11 1 dih11  
c 11 cn12 10 cnc12 3 dih12  
c 12 cc13 11 ccn13 10 dih13  
c 13 cc14 12 ccc14 11 dih14  
c 14 cc15 13 ccc15 12 dih15  
c 15 cc16 14 ccc16 13 dih16  
c 16 cc17 15 ccc17 14 dih17  
c 17 cc18 16 ccc18 15 dih18  
c 18 cc19 17 ccc19 16 dih19  
c 19 cc20 18 ccc20 17 dih20  
h 10 hc21 11 hcn21 12 dih21  
h 10 hc22 11 hcn22 12 dih22  
h 10 hc23 11 hcn23 12 dih23  
h 12 hc24 13 hcc24 14 dih24

|        |    |          |    |       |    |       |
|--------|----|----------|----|-------|----|-------|
| h      | 13 | hc25     | 14 | hcc25 | 15 | dih25 |
| h      | 14 | hc26     | 15 | hcc26 | 20 | dih26 |
| h      | 16 | hc27     | 15 | hcc27 | 20 | dih27 |
| h      | 17 | hc28     | 16 | hcc28 | 15 | dih28 |
| h      | 18 | hc29     | 19 | hcc29 | 20 | dih29 |
| h      | 19 | hc30     | 20 | hcc30 | 15 | dih30 |
| h      | 20 | hc31     | 19 | hcc31 | 18 | dih31 |
| cfe2   |    | 1.834715 |    |       |    |       |
| cfe3   |    | 2.030337 |    |       |    |       |
| cfec3  |    | 174.334  |    |       |    |       |
| cfe4   |    | 1.787065 |    |       |    |       |
| cfec4  |    | 96.463   |    |       |    |       |
| dih4   |    | -170.464 |    |       |    |       |
| cfe5   |    | 1.783225 |    |       |    |       |
| cfec5  |    | 94.448   |    |       |    |       |
| dih5   |    | -68.199  |    |       |    |       |
| oc6    |    | 1.148970 |    |       |    |       |
| ocfe6  |    | 177.199  |    |       |    |       |
| dih6   |    | -85.568  |    |       |    |       |
| oc7    |    | 1.214607 |    |       |    |       |
| ocfe7  |    | 137.210  |    |       |    |       |
| dih7   |    | 15.899   |    |       |    |       |
| oc8    |    | 1.147675 |    |       |    |       |
| ocfe8  |    | 176.830  |    |       |    |       |
| dih8   |    | 96.645   |    |       |    |       |
| oc9    |    | 1.150530 |    |       |    |       |
| ocfe9  |    | 179.604  |    |       |    |       |
| dih9   |    | -56.913  |    |       |    |       |
| cc10   |    | 2.527455 |    |       |    |       |
| ccfe10 |    | 123.845  |    |       |    |       |
| dih10  |    | -158.700 |    |       |    |       |
| nc11   |    | 1.457053 |    |       |    |       |
| ncc11  |    | 25.942   |    |       |    |       |
| dih11  |    | -10.267  |    |       |    |       |
| cn12   |    | 1.428598 |    |       |    |       |
| cnc12  |    | 124.658  |    |       |    |       |
| dih12  |    | 166.060  |    |       |    |       |
| cc13   |    | 1.410460 |    |       |    |       |
| ccn13  |    | 120.317  |    |       |    |       |
| dih13  |    | -104.318 |    |       |    |       |
| cc14   |    | 1.412135 |    |       |    |       |
| ccc14  |    | 122.334  |    |       |    |       |
| dih14  |    | -20.442  |    |       |    |       |
| cc15   |    | 1.477355 |    |       |    |       |
| ccc15  |    | 124.382  |    |       |    |       |
| dih15  |    | -172.189 |    |       |    |       |
| cc16   |    | 1.406122 |    |       |    |       |
| ccc16  |    | 118.288  |    |       |    |       |
| dih16  |    | -163.883 |    |       |    |       |
| cc17   |    | 1.393148 |    |       |    |       |
| ccc17  |    | 121.200  |    |       |    |       |
| dih17  |    | 179.452  |    |       |    |       |

|       |          |
|-------|----------|
| cc18  | 1.395578 |
| ccc18 | 120.129  |
| dih18 | -0.162   |
| cc19  | 1.397114 |
| ccc19 | 119.414  |
| dih19 | 0.101    |
| cc20  | 1.392701 |
| ccc20 | 120.429  |
| dih20 | 0.119    |
| hc21  | 1.097870 |
| hcn21 | 111.721  |
| dih21 | 60.228   |
| hc22  | 1.091932 |
| hcn22 | 107.047  |
| dih22 | 179.927  |
| hc23  | 1.096386 |
| hcn23 | 110.544  |
| dih23 | -61.181  |
| hc24  | 1.087808 |
| hcc24 | 119.613  |
| dih24 | 178.903  |
| hc25  | 1.086850 |
| hcc25 | 119.760  |
| dih25 | -5.872   |
| hc26  | 1.085357 |
| hcc26 | 113.939  |
| dih26 | 171.170  |
| hc27  | 1.087523 |
| hcc27 | 119.150  |
| dih27 | 179.866  |
| hc28  | 1.086554 |
| hcc28 | 119.640  |
| dih28 | 179.933  |
| hc29  | 1.086252 |
| hcc29 | 120.274  |
| dih29 | -179.817 |
| hc30  | 1.086719 |
| hcc30 | 119.492  |
| dih30 | 179.834  |
| hc31  | 1.086189 |
| hcc31 | 118.759  |
| dih31 | 179.334  |

### 3.4 $\eta^3$ C acyl

|    |        |         |        |
|----|--------|---------|--------|
| fe |        |         |        |
| c  | 1 cfe2 |         |        |
| c  | 1 cfe3 | 2 cfec3 |        |
| c  | 1 cfe4 | 2 cfec4 | 3 dih4 |
| c  | 1 cfe5 | 2 cfec5 | 3 dih5 |
| o  | 2 oc6  | 1 ocfe6 | 4 dih6 |
| o  | 3 oc7  | 1 ocfe7 | 4 dih7 |

Electronic Supplementary Information for Dalton Transactions  
This journal is © The Royal Society of Chemistry 2005

|         |    |       |          |        |    |       |
|---------|----|-------|----------|--------|----|-------|
| o       | 4  | oc8   | 1        | ocfe8  | 5  | dih8  |
| o       | 5  | oc9   | 1        | ocfe9  | 4  | dih9  |
| c       | 1  | cfe10 | 4        | cfec10 | 8  | dih10 |
| n       | 1  | nfe11 | 4        | nfec11 | 8  | dih11 |
| c       | 1  | cfe12 | 4        | cfec12 | 8  | dih12 |
| c       | 12 | cc13  | 1        | ccfe13 | 4  | dih13 |
| c       | 13 | cc14  | 12       | ccc14  | 1  | dih14 |
| c       | 14 | cc15  | 13       | ccc15  | 12 | dih15 |
| c       | 15 | cc16  | 14       | ccc16  | 13 | dih16 |
| c       | 16 | cc17  | 15       | ccc17  | 14 | dih17 |
| c       | 17 | cc18  | 16       | ccc18  | 15 | dih18 |
| c       | 18 | cc19  | 17       | ccc19  | 16 | dih19 |
| c       | 15 | cc20  | 14       | ccc20  | 13 | dih20 |
| h       | 10 | hc21  | 11       | hcn21  | 12 | dih21 |
| h       | 10 | hc22  | 11       | hcn22  | 12 | dih22 |
| h       | 10 | hc23  | 11       | hcn23  | 12 | dih23 |
| h       | 12 | hc24  | 13       | hcc24  | 1  | dih24 |
| h       | 13 | hc25  | 12       | hcc25  | 1  | dih25 |
| h       | 14 | hc26  | 13       | hcc26  | 12 | dih26 |
| h       | 16 | hc27  | 15       | hcc27  | 14 | dih27 |
| h       | 17 | hc28  | 16       | hcc28  | 15 | dih28 |
| h       | 18 | hc29  | 17       | hcc29  | 16 | dih29 |
| h       | 19 | hc30  | 18       | hcc30  | 17 | dih30 |
| h       | 20 | hc31  | 15       | hcc31  | 14 | dih31 |
| cfe2=   |    |       | 1.867993 |        |    |       |
| cfe3=   |    |       | 1.989624 |        |    |       |
| cfec3=  |    |       | 174.690  |        |    |       |
| cfe4=   |    |       | 1.791119 |        |    |       |
| cfec4=  |    |       | 95.738   |        |    |       |
| dih4=   |    |       | 164.751  |        |    |       |
| cfe5=   |    |       | 1.782199 |        |    |       |
| cfec5=  |    |       | 94.487   |        |    |       |
| dih5=   |    |       | -95.752  |        |    |       |
| oc6=    |    |       | 1.147982 |        |    |       |
| ocfe6=  |    |       | 174.176  |        |    |       |
| dih6=   |    |       | -73.375  |        |    |       |
| oc7=    |    |       | 1.203225 |        |    |       |
| ocfe7=  |    |       | 133.995  |        |    |       |
| dih7=   |    |       | 8.376    |        |    |       |
| oc8=    |    |       | 1.146621 |        |    |       |
| ocfe8=  |    |       | 176.904  |        |    |       |
| dih8=   |    |       | 113.573  |        |    |       |
| oc9=    |    |       | 1.150550 |        |    |       |
| ocfe9=  |    |       | 178.945  |        |    |       |
| dih9=   |    |       | 52.750   |        |    |       |
| cfe10=  |    |       | 3.165679 |        |    |       |
| cfec10= |    |       | 83.683   |        |    |       |
| dih10=  |    |       | -70.772  |        |    |       |
| nfe11=  |    |       | 2.118691 |        |    |       |
| nfec11= |    |       | 96.064   |        |    |       |
| dih11=  |    |       | -51.889  |        |    |       |
| cfe12=  |    |       | 2.181515 |        |    |       |

|         |          |
|---------|----------|
| cfec12= | 131.432  |
| dih12=  | -59.591  |
| cc13=   | 1.408511 |
| ccfe13= | 71.047   |
| dih13=  | 144.375  |
| cc14=   | 1.532715 |
| ccc14=  | 118.714  |
| dih14=  | -80.567  |
| cc15=   | 1.528350 |
| ccc15=  | 114.353  |
| dih15=  | -171.109 |
| cc16=   | 1.401077 |
| ccc16=  | 122.149  |
| dih16=  | -138.676 |
| cc17=   | 1.396748 |
| ccc17=  | 120.603  |
| dih17=  | -178.168 |
| cc18=   | 1.394076 |
| ccc18=  | 120.535  |
| dih18=  | 0.432    |
| cc19=   | 1.395971 |
| ccc19=  | 119.350  |
| dih19=  | 0.337    |
| cc20=   | 1.403884 |
| ccc20=  | 119.433  |
| dih20=  | 44.154   |
| hc21=   | 1.103028 |
| hcn21=  | 113.304  |
| dih21=  | 32.915   |
| hc22=   | 1.097648 |
| hcn22=  | 109.360  |
| dih22=  | -88.103  |
| hc23=   | 1.092606 |
| hcn23=  | 109.530  |
| dih23=  | 154.414  |
| hc24=   | 1.099434 |
| hcc24=  | 120.030  |
| dih24=  | -116.385 |
| hc25=   | 1.084198 |
| hcc25=  | 118.118  |
| dih25=  | 119.355  |
| hc26=   | 1.102152 |
| hcc26=  | 109.883  |
| dih26=  | -48.884  |
| hc27=   | 1.083960 |
| hcc27=  | 119.739  |
| dih27=  | 1.118    |
| hc28=   | 1.086798 |
| hcc28=  | 119.387  |
| dih28=  | -179.704 |
| hc29=   | 1.086615 |
| hcc29=  | 120.380  |

dih29= 179.947  
hc30= 1.086906  
hcc30= 120.194  
dih30= 179.253  
hc31= 1.087118  
hcc31= 119.916  
dih31= -0.864

### 3.5 $\eta^2$ N=C cisoid

fe  
c 1 cfe2  
c 1 cfe3 2 cfec3  
c 1 cfe4 3 cfec4 2 dih4  
c 1 cfe5 3 cfec5 2 dih5  
o 2 oc6 1 ocfe6 5 dih6  
o 3 oc7 1 ocfe7 5 dih7  
o 4 oc8 1 ocfe8 5 dih8  
o 5 oc9 1 ocfe9 4 dih9  
c 1 cfe10 5 cfec10 9 dih10  
n 1 nfe11 5 nfec11 9 dih11  
c 11 cn12 1 cnfe12 5 dih12  
c 12 cc13 11 ccn13 1 dih13  
c 13 cc14 12 ccc14 11 dih14  
c 14 cc15 13 ccc15 12 dih15  
c 15 cc16 14 ccc16 13 dih16  
c 16 cc17 15 ccc17 14 dih17  
c 17 cc18 16 ccc18 15 dih18  
c 18 cc19 17 ccc19 16 dih19  
c 19 cc20 18 ccc20 17 dih20  
h 10 hc21 11 hcn21 12 dih21  
h 10 hc22 11 hcn22 12 dih22  
h 10 hc23 11 hcn23 12 dih23  
h 12 hc24 13 hcc24 14 dih24  
h 13 hc25 14 hcc25 15 dih25  
h 14 hc26 15 hcc26 20 dih26  
h 16 hc27 15 hcc27 20 dih27  
h 17 hc28 16 hcc28 15 dih28  
h 18 hc29 19 hcc29 20 dih29  
h 19 hc30 20 hcc30 15 dih30  
h 20 hc31 19 hcc31 18 dih31  
cfe2= 1.820657  
cfe3= 1.829281  
cfec3= 177.167  
cfe4= 1.788873  
cfec4= 91.647  
dih4= -115.911  
cfe5= 1.790015  
cfec5= 90.571  
dih5= 131.117  
oc6= 1.149369



|         |          |
|---------|----------|
| ocfe6=  | 178.007  |
| dih6=   | 72.044   |
| oc7=    | 1.144804 |
| ocfe7=  | 178.175  |
| dih7=   | 44.461   |
| oc8=    | 1.153601 |
| ocfe8=  | 177.606  |
| dih8=   | 16.432   |
| oc9=    | 1.152831 |
| ocfe9=  | 176.671  |
| dih9=   | 12.445   |
| cfe10=  | 3.033230 |
| cfec10= | 89.550   |
| dih10=  | -153.518 |
| nfe11=  | 2.133209 |
| nfec11= | 105.808  |
| dih11=  | -174.181 |
| cn12=   | 1.332197 |
| cnfe12= | 77.300   |
| dih12=  | 167.688  |
| cc13=   | 1.466254 |
| ccn13=  | 123.682  |
| dih13=  | 100.407  |
| cc14=   | 1.350253 |
| ccc14=  | 124.025  |
| dih14=  | 18.804   |
| cc15=   | 1.463898 |
| ccc15=  | 127.323  |
| dih15=  | 178.399  |
| cc16=   | 1.407713 |
| ccc16=  | 118.589  |
| dih16=  | -177.309 |
| cc17=   | 1.393274 |
| ccc17=  | 121.264  |
| dih17=  | 179.776  |
| cc18=   | 1.395410 |
| ccc18=  | 120.053  |
| dih18=  | -0.100   |
| cc19=   | 1.398625 |
| ccc19=  | 119.492  |
| dih19=  | 0.199    |
| cc20=   | 1.391004 |
| ccc20=  | 120.440  |
| dih20=  | -0.034   |
| hc21=   | 1.098807 |
| hcn21=  | 108.399  |
| dih21=  | 90.113   |
| hc22=   | 1.103235 |
| hcn22=  | 113.674  |
| dih22=  | -29.697  |
| hc23=   | 1.092516 |
| hcn23=  | 110.097  |

dih23= -152.143  
hc24= 1.101307  
hcc24= 114.570  
dih24= -142.369  
hc25= 1.088044  
hcc25= 121.007  
dih25= 2.245  
hc26= 1.088737  
hcc26= 115.583  
dih26= -177.807  
hc27= 1.087526  
hcc27= 118.938  
dih27= 179.790  
hc28= 1.086744  
hcc28= 119.776  
dih28= 179.878  
hc29= 1.086549  
hcc29= 120.211  
dih29= -179.911  
hc30= 1.086829  
hcc30= 119.605  
dih30= 179.876  
hc31= 1.086245  
hcc31= 119.176  
dih31= 179.657

### **3.6 $\eta^2$ N=C transoid**

fe

|   |    |       |    |        |
|---|----|-------|----|--------|
| c | 1  | cfe2  |    |        |
| c | 1  | cfe3  | 2  | cfec3  |
| c | 1  | cfe4  | 3  | cfec4  |
| c | 1  | cfe5  | 3  | cfec5  |
| o | 2  | oc6   | 1  | ocfe6  |
| o | 3  | oc7   | 1  | ocfe7  |
| o | 4  | oc8   | 1  | ocfe8  |
| o | 5  | oc9   | 1  | ocfe9  |
| c | 1  | cfe10 | 5  | cfec10 |
| n | 1  | nfe11 | 5  | nfec11 |
| c | 11 | cn12  | 1  | cnfe12 |
| c | 12 | cc13  | 11 | ccn13  |
| c | 13 | cc14  | 12 | ccc14  |
| c | 14 | cc15  | 13 | ccc15  |
| c | 15 | cc16  | 14 | ccc16  |
| c | 16 | cc17  | 15 | ccc17  |
| c | 17 | cc18  | 16 | ccc18  |
| c | 18 | cc19  | 17 | ccc19  |
| c | 15 | cc20  | 16 | ccc20  |
| h | 10 | hc21  | 11 | hcn21  |
| h | 10 | hc22  | 11 | hcn22  |
| h | 10 | hc23  | 11 | hcn23  |
| h | 12 | hc24  | 13 | hcc24  |

|        |    |          |    |       |    |       |
|--------|----|----------|----|-------|----|-------|
| h      | 13 | hc25     | 14 | hcc25 | 15 | dih25 |
| h      | 14 | hc26     | 15 | hcc26 | 16 | dih26 |
| h      | 16 | hc27     | 17 | hcc27 | 18 | dih27 |
| h      | 17 | hc28     | 16 | hcc28 | 15 | dih28 |
| h      | 18 | hc29     | 17 | hcc29 | 16 | dih29 |
| h      | 19 | hc30     | 20 | hcc30 | 15 | dih30 |
| h      | 20 | hc31     | 15 | hcc31 | 16 | dih31 |
| cfe2   |    | 1.820529 |    |       |    |       |
| cfe3   |    | 1.823660 |    |       |    |       |
| cfec3  |    | 175.591  |    |       |    |       |
| cfe4   |    | 1.788184 |    |       |    |       |
| cfec4  |    | 92.002   |    |       |    |       |
| dih4   |    | -112.301 |    |       |    |       |
| cfe5   |    | 1.784702 |    |       |    |       |
| cfec5  |    | 91.192   |    |       |    |       |
| dih5   |    | 134.656  |    |       |    |       |
| oc6    |    | 1.150274 |    |       |    |       |
| ocfe6  |    | 178.209  |    |       |    |       |
| dih6   |    | 57.167   |    |       |    |       |
| oc7    |    | 1.147228 |    |       |    |       |
| ocfe7  |    | 177.954  |    |       |    |       |
| dih7   |    | 65.760   |    |       |    |       |
| oc8    |    | 1.153484 |    |       |    |       |
| ocfe8  |    | 177.459  |    |       |    |       |
| dih8   |    | 14.828   |    |       |    |       |
| oc9    |    | 1.153714 |    |       |    |       |
| ocfe9  |    | 175.832  |    |       |    |       |
| dih9   |    | 11.238   |    |       |    |       |
| cfe10  |    | 3.034523 |    |       |    |       |
| cfec10 |    | 87.962   |    |       |    |       |
| dih10  |    | -156.309 |    |       |    |       |
| nfe11  |    | 2.134018 |    |       |    |       |
| nfec11 |    | 106.063  |    |       |    |       |
| dih11  |    | -175.341 |    |       |    |       |
| cn12   |    | 1.328308 |    |       |    |       |
| cnfe12 |    | 81.237   |    |       |    |       |
| dih12  |    | 163.239  |    |       |    |       |
| cc13   |    | 1.453715 |    |       |    |       |
| ccn13  |    | 123.849  |    |       |    |       |
| dih13  |    | 93.956   |    |       |    |       |
| cc14   |    | 1.351857 |    |       |    |       |
| ccc14  |    | 122.157  |    |       |    |       |
| dih14  |    | 169.493  |    |       |    |       |
| cc15   |    | 1.461695 |    |       |    |       |
| ccc15  |    | 127.748  |    |       |    |       |
| dih15  |    | -178.803 |    |       |    |       |
| cc16   |    | 1.409581 |    |       |    |       |
| ccc16  |    | 123.390  |    |       |    |       |
| dih16  |    | -0.146   |    |       |    |       |
| cc17   |    | 1.390807 |    |       |    |       |
| ccc17  |    | 120.819  |    |       |    |       |
| dih17  |    | -179.701 |    |       |    |       |

|       |          |
|-------|----------|
| cc18  | 1.398777 |
| ccc18 | 120.452  |
| dih18 | 0.021    |
| cc19  | 1.395526 |
| ccc19 | 119.519  |
| dih19 | -0.033   |
| cc20  | 1.408039 |
| ccc20 | 117.922  |
| dih20 | 0.023    |
| hc21  | 1.098626 |
| hcn21 | 108.532  |
| dih21 | 87.540   |
| hc22  | 1.102746 |
| hcn22 | 113.518  |
| dih22 | -32.524  |
| hc23  | 1.091900 |
| hcn23 | 109.907  |
| dih23 | -154.662 |
| hc24  | 1.101490 |
| hcc24 | 115.112  |
| dih24 | 5.541    |
| hc25  | 1.086490 |
| hcc25 | 121.414  |
| dih25 | -1.295   |
| hc26  | 1.090824 |
| hcc26 | 114.799  |
| dih26 | 179.175  |
| hc27  | 1.086124 |
| hcc27 | 119.235  |
| dih27 | -179.905 |
| hc28  | 1.086751 |
| hcc28 | 119.571  |
| dih28 | 179.893  |
| hc29  | 1.086443 |
| hcc29 | 120.202  |
| dih29 | 179.808  |
| hc30  | 1.086698 |
| hcc30 | 119.757  |
| dih30 | -179.856 |
| hc31  | 1.087640 |
| hcc31 | 119.027  |
| dih31 | -179.894 |

### 3.7 $\sigma^2$ N cisoid

|    |   |      |   |       |
|----|---|------|---|-------|
| fe |   |      |   |       |
| c  | 1 | cfe2 |   |       |
| c  | 1 | cfe3 | 2 | cfec3 |
| c  | 1 | cfe4 | 2 | cfec4 |
| c  | 1 | cfe5 | 4 | cfec5 |
| o  | 2 | oc6  | 1 | ocfe6 |
| o  | 3 | oc7  | 1 | ocfe7 |
|    |   |      | 3 | dih4  |
|    |   |      | 2 | dih5  |
|    |   |      | 3 | dih6  |
|    |   |      | 2 | dih7  |

|         |    |       |          |        |    |       |
|---------|----|-------|----------|--------|----|-------|
| o       | 4  | oc8   | 1        | ocfe8  | 3  | dih8  |
| o       | 5  | oc9   | 1        | ocfe9  | 3  | dih9  |
| c       | 3  | cc10  | 1        | ccfe10 | 2  | dih10 |
| n       | 1  | nfe11 | 3        | nfec11 | 7  | dih11 |
| c       | 11 | cn12  | 1        | cnfe12 | 3  | dih12 |
| c       | 12 | cc13  | 11       | ccn13  | 1  | dih13 |
| c       | 13 | cc14  | 12       | ccc14  | 11 | dih14 |
| c       | 14 | cc15  | 13       | ccc15  | 12 | dih15 |
| c       | 15 | cc16  | 14       | ccc16  | 13 | dih16 |
| c       | 16 | cc17  | 15       | ccc17  | 14 | dih17 |
| c       | 17 | cc18  | 16       | ccc18  | 15 | dih18 |
| c       | 18 | cc19  | 17       | ccc19  | 16 | dih19 |
| c       | 19 | cc20  | 18       | ccc20  | 17 | dih20 |
| h       | 10 | hc21  | 11       | hcn21  | 12 | dih21 |
| h       | 10 | hc22  | 11       | hcn22  | 12 | dih22 |
| h       | 10 | hc23  | 11       | hcn23  | 12 | dih23 |
| h       | 12 | hc24  | 13       | hcc24  | 14 | dih24 |
| h       | 13 | hc25  | 14       | hcc25  | 15 | dih25 |
| h       | 14 | hc26  | 15       | hcc26  | 20 | dih26 |
| h       | 16 | hc27  | 15       | hcc27  | 20 | dih27 |
| h       | 17 | hc28  | 16       | hcc28  | 15 | dih28 |
| h       | 18 | hc29  | 19       | hcc29  | 20 | dih29 |
| h       | 19 | hc30  | 20       | hcc30  | 15 | dih30 |
| h       | 20 | hc31  | 19       | hcc31  | 18 | dih31 |
| cfe2=   |    |       | 1.775692 |        |    |       |
| cfe3=   |    |       | 1.806657 |        |    |       |
| cfec3=  |    |       | 91.499   |        |    |       |
| cfe4=   |    |       | 1.802044 |        |    |       |
| cfec4=  |    |       | 89.980   |        |    |       |
| dih4=   |    |       | -114.267 |        |    |       |
| cfe5=   |    |       | 1.802086 |        |    |       |
| cfec5=  |    |       | 131.301  |        |    |       |
| dih5=   |    |       | 89.922   |        |    |       |
| oc6=    |    |       | 1.153925 |        |    |       |
| ocfe6=  |    |       | 178.970  |        |    |       |
| dih6=   |    |       | 179.427  |        |    |       |
| oc7=    |    |       | 1.155816 |        |    |       |
| ocfe7=  |    |       | 175.518  |        |    |       |
| dih7=   |    |       | 0.004    |        |    |       |
| oc8=    |    |       | 1.156660 |        |    |       |
| ocfe8=  |    |       | 178.031  |        |    |       |
| dih8=   |    |       | 41.823   |        |    |       |
| oc9=    |    |       | 1.156723 |        |    |       |
| ocfe9=  |    |       | 178.066  |        |    |       |
| dih9=   |    |       | -43.700  |        |    |       |
| cc10=   |    |       | 2.895159 |        |    |       |
| ccfe10= |    |       | 75.738   |        |    |       |
| dih10=  |    |       | 179.635  |        |    |       |
| nfe11=  |    |       | 2.092054 |        |    |       |
| nfec11= |    |       | 95.103   |        |    |       |
| dih11=  |    |       | -179.902 |        |    |       |
| cn12=   |    |       | 1.296579 |        |    |       |

|         |          |
|---------|----------|
| cnfe12= | 130.726  |
| dih12=  | -179.604 |
| cc13=   | 1.452013 |
| ccn13=  | 132.743  |
| dih13=  | 0.014    |
| cc14=   | 1.355233 |
| ccc14=  | 130.049  |
| dih14=  | -0.457   |
| cc15=   | 1.460743 |
| ccc15=  | 126.594  |
| dih15=  | -179.880 |
| cc16=   | 1.408605 |
| ccc16=  | 117.903  |
| dih16=  | -179.760 |
| cc17=   | 1.392566 |
| ccc17=  | 121.121  |
| dih17=  | 179.991  |
| cc18=   | 1.395467 |
| ccc18=  | 119.908  |
| dih18=  | 0.013    |
| cc19=   | 1.399281 |
| ccc19=  | 119.780  |
| dih19=  | 0.004    |
| cc20=   | 1.389960 |
| ccc20=  | 120.324  |
| dih20=  | -0.015   |
| hc21=   | 1.096990 |
| hcn21=  | 111.848  |
| dih21=  | -0.134   |
| hc22=   | 1.093596 |
| hcn22=  | 109.379  |
| dih22=  | -121.018 |
| hc23=   | 1.093618 |
| hcn23=  | 109.439  |
| dih23=  | 120.765  |
| hc24=   | 1.095109 |
| hcc24=  | 111.725  |
| dih24=  | 179.512  |
| hc25=   | 1.087657 |
| hcc25=  | 118.543  |
| dih25=  | -0.025   |
| hc26=   | 1.084629 |
| hcc26=  | 115.360  |
| dih26=  | -179.742 |
| hc27=   | 1.087082 |
| hcc27=  | 119.009  |
| dih27=  | -179.998 |
| hc28=   | 1.086295 |
| hcc28=  | 119.870  |
| dih28=  | -180.000 |
| hc29=   | 1.086404 |
| hcc29=  | 120.050  |

dih29= 179.995  
hc30= 1.086535  
hcc30= 119.704  
dih30= -179.978  
hc31= 1.085746  
hcc31= 119.141  
dih31= 179.986

### 3.8 $\sigma^2$ N transoid

fe  
c 1 cfe2  
c 1 cfe3 2 cfec3  
c 1 cfe4 2 cfec4 3 dih4  
c 1 cfe5 4 cfec5 2 dih5  
o 2 oc6 1 ocfe6 3 dih6  
o 3 oc7 1 ocfe7 2 dih7  
o 4 oc8 1 ocfe8 3 dih8  
o 5 oc9 1 ocfe9 3 dih9  
c 3 cc10 1 ccfe10 2 dih10  
n 1 nfe11 3 nfec11 7 dih11  
c 11 cn12 1 cnfe12 3 dih12  
c 12 cc13 11 ccn13 1 dih13  
c 13 cc14 12 ccc14 11 dih14  
c 14 cc15 13 ccc15 12 dih15  
c 15 cc16 14 ccc16 13 dih16  
c 16 cc17 15 ccc17 14 dih17  
c 17 cc18 16 ccc18 15 dih18  
c 18 cc19 17 ccc19 16 dih19  
c 15 cc20 16 ccc20 17 dih20  
h 10 hc21 11 hcn21 12 dih21  
h 10 hc22 11 hcn22 12 dih22  
h 10 hc23 11 hcn23 12 dih23  
h 12 hc24 13 hcc24 14 dih24  
h 13 hc25 14 hcc25 15 dih25  
h 14 hc26 15 hcc26 16 dih26  
h 16 hc27 17 hcc27 18 dih27  
h 17 hc28 16 hcc28 15 dih28  
h 18 hc29 17 hcc29 16 dih29  
h 19 hc30 20 hcc30 15 dih30  
h 20 hc31 15 hcc31 16 dih31  
cfe2 1.777101  
cfe3 1.804647  
cfec3 90.864  
cfe4 1.801855  
cfec4 90.154  
dih4 -116.605  
cfe5 1.801800  
cfec5 127.016  
dih5 90.422  
oc6 1.153521  
ocfe6 179.290

|        |          |
|--------|----------|
| dih6   | 176.792  |
| oc7    | 1.156356 |
| ocfe7  | 176.668  |
| dih7   | 1.299    |
| oc8    | 1.156964 |
| ocfe8  | 178.533  |
| dih8   | 54.864   |
| oc9    | 1.156950 |
| ocfe9  | 178.484  |
| dih9   | -53.847  |
| cc10   | 2.922611 |
| ccfe10 | 76.541   |
| dih10  | 179.991  |
| nfe11  | 2.092281 |
| nfec11 | 93.592   |
| dih11  | -178.728 |
| cn12   | 1.293644 |
| cnfe12 | 126.397  |
| dih12  | -179.879 |
| cc13   | 1.441296 |
| ccn13  | 126.504  |
| dih13  | -0.013   |
| cc14   | 1.354618 |
| ccc14  | 120.388  |
| dih14  | 179.746  |
| cc15   | 1.459138 |
| ccc15  | 127.604  |
| dih15  | -179.837 |
| cc16   | 1.409644 |
| ccc16  | 123.053  |
| dih16  | 0.205    |
| cc17   | 1.389974 |
| ccc17  | 120.617  |
| dih17  | 179.910  |
| cc18   | 1.399164 |
| ccc18  | 120.344  |
| dih18  | 0.001    |
| cc19   | 1.395618 |
| ccc19  | 119.781  |
| dih19  | 0.002    |
| cc20   | 1.407825 |
| ccc20  | 118.288  |
| dih20  | -0.006   |
| hc21   | 1.097194 |
| hcn21  | 111.814  |
| dih21  | -0.139   |
| hc22   | 1.093856 |
| hcn22  | 109.393  |
| dih22  | -121.104 |
| hc23   | 1.093881 |
| hcn23  | 109.383  |
| dih23  | 120.813  |



|       |          |
|-------|----------|
| hc24  | 1.095778 |
| hcc24 | 115.648  |
| dih24 | -0.213   |
| hc25  | 1.083578 |
| hcc25 | 122.151  |
| dih25 | 0.110    |
| hc26  | 1.091110 |
| hcc26 | 114.754  |
| dih26 | -179.718 |
| hc27  | 1.085561 |
| hcc27 | 119.372  |
| dih27 | 179.940  |
| hc28  | 1.086321 |
| hcc28 | 119.643  |
| dih28 | -179.973 |
| hc29  | 1.086359 |
| hcc29 | 120.068  |
| dih29 | -179.988 |
| hc30  | 1.086273 |
| hcc30 | 119.843  |
| dih30 | 179.981  |
| hc31  | 1.087431 |
| hcc31 | 119.198  |
| dih31 | 179.994  |

#### **4. Z-matrix coordinates of the 1-oxabuta-1,3-diene complexes**

##### **4.1 $\eta^2$ olefin cisoid**

|    |         |          |          |
|----|---------|----------|----------|
| fe |         |          |          |
| c  | 1 cfe2  |          |          |
| c  | 1 cfe3  | 2 cfec3  |          |
| c  | 1 cfe4  | 3 cfec4  | 2 dih4   |
| c  | 1 cfe5  | 4 cfec5  | 3 dih5   |
| o  | 2 oc6   | 1 ocfe6  | 5 dih6   |
| o  | 3 oc7   | 1 ocfe7  | 5 dih7   |
| o  | 4 oc8   | 1 ocfe8  | 5 dih8   |
| o  | 5 oc9   | 1 ocfe9  | 2 dih9   |
| o  | 3 oc10  | 1 ocfe10 | 5 dih10  |
| c  | 10 col1 | 3 coc11  | 1 dih11  |
| c  | 11 cc12 | 10 cco12 | 3 dih12  |
| c  | 12 cc13 | 11 ccc13 | 10 dih13 |
| c  | 13 cc14 | 12 ccc14 | 11 dih14 |
| c  | 14 cc15 | 13 ccc15 | 12 dih15 |
| c  | 15 cc16 | 14 ccc16 | 13 dih16 |
| c  | 16 cc17 | 15 ccc17 | 14 dih17 |
| c  | 17 cc18 | 16 ccc18 | 15 dih18 |
| c  | 18 cc19 | 17 ccc19 | 16 dih19 |
| h  | 11 hc20 | 12 hcc20 | 13 dih20 |
| h  | 12 hc21 | 13 hcc21 | 14 dih21 |
| h  | 13 hc22 | 14 hcc22 | 19 dih22 |
| h  | 15 hc23 | 14 hcc23 | 19 dih23 |

|         |    |          |    |       |    |       |
|---------|----|----------|----|-------|----|-------|
| h       | 16 | hc24     | 15 | hcc24 | 14 | dih24 |
| h       | 17 | hc25     | 18 | hcc25 | 19 | dih25 |
| h       | 18 | hc26     | 19 | hcc26 | 14 | dih26 |
| h       | 19 | hc27     | 18 | hcc27 | 17 | dih27 |
| cfe2=   |    | 1.818891 |    |       |    |       |
| cfe3=   |    | 1.838784 |    |       |    |       |
| cfec3=  |    | 179.103  |    |       |    |       |
| cfe4=   |    | 1.792269 |    |       |    |       |
| cfec4=  |    | 89.029   |    |       |    |       |
| dih4=   |    | 18.155   |    |       |    |       |
| cfe5=   |    | 1.798679 |    |       |    |       |
| cfec5=  |    | 112.610  |    |       |    |       |
| dih5=   |    | 89.626   |    |       |    |       |
| oc6=    |    | 1.146749 |    |       |    |       |
| ocfe6=  |    | 178.275  |    |       |    |       |
| dih6=   |    | 13.877   |    |       |    |       |
| oc7=    |    | 1.143752 |    |       |    |       |
| ocfe7=  |    | 175.203  |    |       |    |       |
| dih7=   |    | -76.929  |    |       |    |       |
| oc8=    |    | 1.150931 |    |       |    |       |
| ocfe8=  |    | 179.202  |    |       |    |       |
| dih8=   |    | -57.454  |    |       |    |       |
| oc9=    |    | 1.151240 |    |       |    |       |
| ocfe9=  |    | 177.760  |    |       |    |       |
| dih9=   |    | -94.476  |    |       |    |       |
| oc10=   |    | 2.840896 |    |       |    |       |
| ocfe10= |    | 95.498   |    |       |    |       |
| dih10=  |    | 98.233   |    |       |    |       |
| oc11=   |    | 1.220093 |    |       |    |       |
| coc11=  |    | 83.524   |    |       |    |       |
| dih11=  |    | -16.248  |    |       |    |       |
| cc12=   |    | 1.478137 |    |       |    |       |
| cco12=  |    | 125.386  |    |       |    |       |
| dih12=  |    | 54.280   |    |       |    |       |
| cc13=   |    | 1.414163 |    |       |    |       |
| ccc13=  |    | 121.619  |    |       |    |       |
| dih13=  |    | 4.957    |    |       |    |       |
| cc14=   |    | 1.479753 |    |       |    |       |
| ccc14=  |    | 126.700  |    |       |    |       |
| dih14=  |    | 148.813  |    |       |    |       |
| cc15=   |    | 1.406909 |    |       |    |       |
| ccc15=  |    | 118.575  |    |       |    |       |
| dih15=  |    | -178.392 |    |       |    |       |
| cc16=   |    | 1.392052 |    |       |    |       |
| ccc16=  |    | 121.188  |    |       |    |       |
| dih16=  |    | 179.031  |    |       |    |       |
| cc17=   |    | 1.396953 |    |       |    |       |
| ccc17=  |    | 120.101  |    |       |    |       |
| dih17=  |    | -0.330   |    |       |    |       |
| cc18=   |    | 1.396145 |    |       |    |       |
| ccc18=  |    | 119.451  |    |       |    |       |
| dih18=  |    | -0.466   |    |       |    |       |

cc19= 1.393928  
ccc19= 120.412  
dih19= 0.481  
hc20= 1.111686  
hcc20= 114.255  
dih20= -174.253  
hc21= 1.087393  
hcc21= 120.375  
dih21= -6.263  
hc22= 1.087298  
hcc22= 113.554  
dih22= 153.511  
hc23= 1.087735  
hcc23= 119.044  
dih23= -179.199  
hc24= 1.086678  
hcc24= 119.718  
dih24= 179.869  
hc25= 1.086218  
hcc25= 120.259  
dih25= 179.941  
hc26= 1.086785  
hcc26= 119.513  
dih26= 179.793  
hc27= 1.086011  
hcc27= 119.039  
dih27= -178.638

#### **4.2 $\eta^2$ olefin transoid**

fe  
c 1 cfe2  
c 1 cfe3 2 cfec3  
c 1 cfe4 2 cfec4 3 dih4  
c 1 cfe5 2 cfec5 3 dih5  
o 2 oc6 1 ocfe6 4 dih6  
o 3 oc7 1 ocfe7 4 dih7  
o 4 oc8 1 ocfe8 5 dih8  
o 5 oc9 1 ocfe9 4 dih9  
o 1 ofe10 4 ofec10 8 dih10  
c 10 co11 1 cofe11 4 dih11  
c 11 cc12 10 cco12 1 dih12  
c 12 cc13 11 ccc13 10 dih13  
c 13 cc14 12 ccc14 11 dih14  
c 14 cc15 13 ccc15 12 dih15  
c 15 cc16 14 ccc16 13 dih16  
c 16 cc17 15 ccc17 14 dih17  
c 17 cc18 16 ccc18 15 dih18  
c 18 cc19 17 ccc19 16 dih19  
h 11 hc20 12 hcc20 13 dih20  
h 12 hc21 13 hcc21 14 dih21  
h 13 hc22 14 hcc22 19 dih22

|         |    |      |    |       |    |          |
|---------|----|------|----|-------|----|----------|
| h       | 15 | hc23 | 14 | hcc23 | 19 | dih23    |
| h       | 16 | hc24 | 15 | hcc24 | 14 | dih24    |
| h       | 17 | hc25 | 18 | hcc25 | 19 | dih25    |
| h       | 18 | hc26 | 19 | hcc26 | 14 | dih26    |
| h       | 19 | hc27 | 18 | hcc27 | 17 | dih27    |
| cfe2=   |    |      |    |       |    | 1.821120 |
| cfe3=   |    |      |    |       |    | 1.823678 |
| cfec3=  |    |      |    |       |    | 179.353  |
| cfe4=   |    |      |    |       |    | 1.791735 |
| cfec4=  |    |      |    |       |    | 90.396   |
| dih4=   |    |      |    |       |    | -53.830  |
| cfe5=   |    |      |    |       |    | 1.801429 |
| cfec5=  |    |      |    |       |    | 89.634   |
| dih5=   |    |      |    |       |    | 59.454   |
| oc6=    |    |      |    |       |    | 1.146176 |
| ocfe6=  |    |      |    |       |    | 178.428  |
| dih6=   |    |      |    |       |    | -95.959  |
| oc7=    |    |      |    |       |    | 1.147752 |
| ocfe7=  |    |      |    |       |    | 176.352  |
| dih7=   |    |      |    |       |    | 23.185   |
| oc8=    |    |      |    |       |    | 1.151028 |
| ocfe8=  |    |      |    |       |    | 179.116  |
| dih8=   |    |      |    |       |    | -41.172  |
| oc9=    |    |      |    |       |    | 1.149770 |
| ocfe9=  |    |      |    |       |    | 177.981  |
| dih9=   |    |      |    |       |    | -11.069  |
| ofe10=  |    |      |    |       |    | 3.867704 |
| ofec10= |    |      |    |       |    | 164.757  |
| dih10=  |    |      |    |       |    | -175.865 |
| col1=   |    |      |    |       |    | 1.215759 |
| cofe11= |    |      |    |       |    | 36.496   |
| dih11=  |    |      |    |       |    | -13.265  |
| cc12=   |    |      |    |       |    | 1.474744 |
| cco12=  |    |      |    |       |    | 124.557  |
| dih12=  |    |      |    |       |    | -54.658  |
| cc13=   |    |      |    |       |    | 1.414808 |
| ccc13=  |    |      |    |       |    | 121.672  |
| dih13=  |    |      |    |       |    | -166.255 |
| cc14=   |    |      |    |       |    | 1.480479 |
| ccc14=  |    |      |    |       |    | 126.609  |
| dih14=  |    |      |    |       |    | 148.148  |
| cc15=   |    |      |    |       |    | 1.406660 |
| ccc15=  |    |      |    |       |    | 118.623  |
| dih15=  |    |      |    |       |    | -178.139 |
| cc16=   |    |      |    |       |    | 1.391874 |
| ccc16=  |    |      |    |       |    | 121.172  |
| dih16=  |    |      |    |       |    | 179.064  |
| cc17=   |    |      |    |       |    | 1.396958 |
| ccc17=  |    |      |    |       |    | 120.088  |
| dih17=  |    |      |    |       |    | -0.254   |
| cc18=   |    |      |    |       |    | 1.396048 |
| ccc18=  |    |      |    |       |    | 119.442  |

dih18= -0.493  
cc19= 1.393986  
ccc19= 120.457  
dih19= 0.464  
hc20= 1.115278  
hcc20= 114.853  
dih20= 12.404  
hc21= 1.086822  
hcc21= 120.679  
dih21= -5.881  
hc22= 1.089208  
hcc22= 112.654  
dih22= 154.068  
hc23= 1.087902  
hcc23= 119.125  
dih23= -179.336  
hc24= 1.086567  
hcc24= 119.703  
dih24= 179.895  
hc25= 1.086215  
hcc25= 120.270  
dih25= 179.955  
hc26= 1.086566  
hcc26= 119.448  
dih26= 179.778  
hc27= 1.085804  
hcc27= 119.064  
dih27= -178.602

### 4.3 $\eta^3$ allyl

fe  
c 1 cfe2  
c 1 cfe3 2 cfec3  
c 1 cfe4 2 cfec4 3 dih4  
c 1 cfe5 2 cfec5 3 dih5  
o 2 oc6 1 ocfe6 4 dih6  
o 3 oc7 1 ocfe7 4 dih7  
o 4 oc8 1 ocfe8 5 dih8  
o 5 oc9 1 ocfe9 4 dih9  
o 3 oc10 1 ocfe10 4 dih10  
c 10 co11 3 coc11 1 dih11  
c 11 cc12 10 cco12 3 dih12  
c 12 cc13 11 ccc13 10 dih13  
c 13 cc14 12 ccc14 11 dih14  
c 14 cc15 13 ccc15 12 dih15  
c 15 cc16 14 ccc16 13 dih16  
c 16 cc17 15 ccc17 14 dih17  
c 17 cc18 16 ccc18 15 dih18  
c 18 cc19 17 ccc19 16 dih19  
h 11 hc20 12 hcc20 13 dih20

|         |    |          |    |       |    |       |
|---------|----|----------|----|-------|----|-------|
| h       | 12 | hc21     | 13 | hcc21 | 14 | dih21 |
| h       | 13 | hc22     | 14 | hcc22 | 19 | dih22 |
| h       | 15 | hc23     | 14 | hcc23 | 19 | dih23 |
| h       | 16 | hc24     | 15 | hcc24 | 14 | dih24 |
| h       | 17 | hc25     | 18 | hcc25 | 19 | dih25 |
| h       | 18 | hc26     | 19 | hcc26 | 14 | dih26 |
| h       | 19 | hc27     | 18 | hcc27 | 17 | dih27 |
| cfe2=   |    | 1.840491 |    |       |    |       |
| cfe3=   |    | 1.983199 |    |       |    |       |
| cfec3=  |    | 174.580  |    |       |    |       |
| cfe4=   |    | 1.793851 |    |       |    |       |
| cfec4=  |    | 95.061   |    |       |    |       |
| dih4=   |    | 178.011  |    |       |    |       |
| cfe5=   |    | 1.786507 |    |       |    |       |
| cfec5=  |    | 94.132   |    |       |    |       |
| dih5=   |    | -79.007  |    |       |    |       |
| oc6=    |    | 1.147439 |    |       |    |       |
| ocfe6=  |    | 177.920  |    |       |    |       |
| dih6=   |    | -98.764  |    |       |    |       |
| oc7=    |    | 1.196684 |    |       |    |       |
| ocfe7=  |    | 139.933  |    |       |    |       |
| dih7=   |    | 19.399   |    |       |    |       |
| oc8=    |    | 1.146620 |    |       |    |       |
| ocfe8=  |    | 176.704  |    |       |    |       |
| dih8=   |    | 99.135   |    |       |    |       |
| oc9=    |    | 1.149276 |    |       |    |       |
| ocfe9=  |    | 179.223  |    |       |    |       |
| dih9=   |    | 18.199   |    |       |    |       |
| oc10=   |    | 1.405064 |    |       |    |       |
| ocfe10= |    | 99.499   |    |       |    |       |
| dih10=  |    | -161.088 |    |       |    |       |
| oc11=   |    | 1.402285 |    |       |    |       |
| coc11=  |    | 103.303  |    |       |    |       |
| dih11=  |    | -0.226   |    |       |    |       |
| cc12=   |    | 1.403718 |    |       |    |       |
| cco12=  |    | 119.887  |    |       |    |       |
| dih12=  |    | 69.905   |    |       |    |       |
| cc13=   |    | 1.411174 |    |       |    |       |
| ccc13=  |    | 121.849  |    |       |    |       |
| dih13=  |    | -23.757  |    |       |    |       |
| cc14=   |    | 1.476310 |    |       |    |       |
| ccc14=  |    | 124.709  |    |       |    |       |
| dih14=  |    | -170.948 |    |       |    |       |
| cc15=   |    | 1.406143 |    |       |    |       |
| ccc15=  |    | 118.251  |    |       |    |       |
| dih15=  |    | -166.274 |    |       |    |       |
| cc16=   |    | 1.393193 |    |       |    |       |
| ccc16=  |    | 121.119  |    |       |    |       |
| dih16=  |    | -179.977 |    |       |    |       |
| cc17=   |    | 1.395697 |    |       |    |       |
| ccc17=  |    | 120.115  |    |       |    |       |
| dih17=  |    | -0.219   |    |       |    |       |

cc18= 1.397207  
ccc18= 119.477  
dih18= -0.050  
cc19= 1.392527  
ccc19= 120.395  
dih19= 0.250  
hc20= 1.084688  
hcc20= 121.680  
dih20= -179.528  
hc21= 1.086410  
hcc21= 120.466  
dih21= -4.782  
hc22= 1.085358  
hcc22= 114.056  
dih22= 169.725  
hc23= 1.087520  
hcc23= 119.181  
dih23= -179.883  
hc24= 1.086408  
hcc24= 119.665  
dih24= 179.831  
hc25= 1.086262  
hcc25= 120.213  
dih25= -179.727  
hc26= 1.086589  
hcc26= 119.518  
dih26= 179.929  
hc27= 1.086231  
hcc27= 118.767  
dih27= 179.610

#### 4.4 $\eta^3$ C-acyl

fe  
c 1 cfe2  
c 1 cfe3 2 cfec3  
c 1 cfe4 2 cfec4 3 dih4  
c 1 cfe5 2 cfec5 3 dih5  
o 2 oc6 1 ocfe6 4 dih6  
o 3 oc7 1 ocfe7 4 dih7  
o 4 oc8 1 ocfe8 5 dih8  
o 5 oc9 1 ocfe9 4 dih9  
o 1 ofe10 4 ofec10 8 dih10  
c 1 cfe11 4 cfec11 8 dih11  
c 11 cc12 1 ccfe12 4 dih12  
c 12 cc13 11 ccc13 1 dih13  
c 13 cc14 12 ccc14 11 dih14  
c 14 cc15 13 ccc15 12 dih15  
c 15 cc16 14 ccc16 13 dih16  
c 16 cc17 15 ccc17 14 dih17  
c 17 cc18 16 ccc18 15 dih18  
c 14 cc19 13 ccc19 12 dih19

|         |    |          |    |       |    |       |
|---------|----|----------|----|-------|----|-------|
| h       | 11 | hc20     | 12 | hcc20 | 1  | dih20 |
| h       | 12 | hc21     | 11 | hcc21 | 1  | dih21 |
| h       | 13 | hc22     | 12 | hcc22 | 11 | dih22 |
| h       | 15 | hc23     | 14 | hcc23 | 13 | dih23 |
| h       | 16 | hc24     | 15 | hcc24 | 14 | dih24 |
| h       | 17 | hc25     | 16 | hcc25 | 15 | dih25 |
| h       | 18 | hc26     | 17 | hcc26 | 16 | dih26 |
| h       | 19 | hc27     | 14 | hcc27 | 13 | dih27 |
| cfe2=   |    | 1.889610 |    |       |    |       |
| cfe3=   |    | 1.980737 |    |       |    |       |
| cfec3=  |    | 174.675  |    |       |    |       |
| cfe4=   |    | 1.799353 |    |       |    |       |
| cfec4=  |    | 94.889   |    |       |    |       |
| dih4=   |    | 145.434  |    |       |    |       |
| cfe5=   |    | 1.781546 |    |       |    |       |
| cfec5=  |    | 95.374   |    |       |    |       |
| dih5=   |    | -116.388 |    |       |    |       |
| oc6=    |    | 1.144904 |    |       |    |       |
| ocfe6=  |    | 175.103  |    |       |    |       |
| dih6=   |    | -69.574  |    |       |    |       |
| oc7=    |    | 1.202933 |    |       |    |       |
| ocfe7=  |    | 133.080  |    |       |    |       |
| dih7=   |    | 5.902    |    |       |    |       |
| oc8=    |    | 1.143791 |    |       |    |       |
| ocfe8=  |    | 177.303  |    |       |    |       |
| dih8=   |    | 113.424  |    |       |    |       |
| oc9=    |    | 1.149447 |    |       |    |       |
| ocfe9=  |    | 179.715  |    |       |    |       |
| dih9=   |    | 85.883   |    |       |    |       |
| ofe10=  |    | 2.064441 |    |       |    |       |
| ofec10= |    | 98.081   |    |       |    |       |
| dih10=  |    | -54.102  |    |       |    |       |
| cfe11=  |    | 2.153470 |    |       |    |       |
| cfec11= |    | 133.146  |    |       |    |       |
| dih11=  |    | -60.448  |    |       |    |       |
| cc12=   |    | 1.400613 |    |       |    |       |
| ccfe12= |    | 74.165   |    |       |    |       |
| dih12=  |    | 143.198  |    |       |    |       |
| cc13=   |    | 1.531326 |    |       |    |       |
| ccc13=  |    | 118.765  |    |       |    |       |
| dih13=  |    | -77.367  |    |       |    |       |
| cc14=   |    | 1.529304 |    |       |    |       |
| ccc14=  |    | 114.231  |    |       |    |       |
| dih14=  |    | -175.309 |    |       |    |       |
| cc15=   |    | 1.400778 |    |       |    |       |
| ccc15=  |    | 122.093  |    |       |    |       |
| dih15=  |    | -139.357 |    |       |    |       |
| cc16=   |    | 1.396675 |    |       |    |       |
| ccc16=  |    | 120.582  |    |       |    |       |
| dih16=  |    | -178.208 |    |       |    |       |
| cc17=   |    | 1.393955 |    |       |    |       |
| ccc17=  |    | 120.524  |    |       |    |       |



dih17= 0.496  
cc18= 1.396013  
ccc18= 119.360  
dih18= 0.369  
cc19= 1.403613  
ccc19= 119.431  
dih19= 43.539  
hc20= 1.101207  
hcc20= 120.133  
dih20= -118.311  
hc21= 1.084967  
hcc21= 118.500  
dih21= 119.454  
hc22= 1.102057  
hcc22= 109.770  
dih22= -53.425  
hc23= 1.084020  
hcc23= 119.843  
dih23= 1.031  
hc24= 1.086751  
hcc24= 119.333  
dih24= -179.644  
hc25= 1.086585  
hcc25= 120.370  
dih25= 179.952  
hc26= 1.086827  
hcc26= 120.236  
dih26= 179.179  
hc27= 1.087104  
hcc27= 119.993  
dih27= -0.766

#### 4.5 $\eta^2$ N=C cisoid

fe  
c 1 cfe2  
c 1 cfe3 2 cfec3  
c 1 cfe4 2 cfec4 3 dih4  
c 1 cfe5 2 cfec5 3 dih5  
o 2 oc6 1 ocfe6 4 dih6  
o 3 oc7 1 ocfe7 4 dih7  
o 4 oc8 1 ocfe8 5 dih8  
o 5 oc9 1 ocfe9 4 dih9  
o 1 ofe10 4 ofec10 8 dih10  
c 10 co11 1 cofe11 4 dih11  
c 11 cc12 10 cco12 1 dih12  
c 12 cc13 11 ccc13 10 dih13  
c 13 cc14 12 ccc14 11 dih14  
c 14 cc15 13 ccc15 12 dih15  
c 15 cc16 14 ccc16 13 dih16  
c 16 cc17 15 ccc17 14 dih17  
c 17 cc18 16 ccc18 15 dih18

|         |    |          |    |       |    |       |
|---------|----|----------|----|-------|----|-------|
| c       | 18 | cc19     | 17 | ccc19 | 16 | dih19 |
| h       | 11 | hc20     | 12 | hcc20 | 13 | dih20 |
| h       | 12 | hc21     | 13 | hcc21 | 14 | dih21 |
| h       | 13 | hc22     | 14 | hcc22 | 19 | dih22 |
| h       | 15 | hc23     | 14 | hcc23 | 19 | dih23 |
| h       | 16 | hc24     | 15 | hcc24 | 14 | dih24 |
| h       | 17 | hc25     | 18 | hcc25 | 19 | dih25 |
| h       | 18 | hc26     | 19 | hcc26 | 14 | dih26 |
| h       | 19 | hc27     | 18 | hcc27 | 17 | dih27 |
| cfe2=   |    | 1.829856 |    |       |    |       |
| cfe3=   |    | 1.829956 |    |       |    |       |
| cfec3=  |    | 175.318  |    |       |    |       |
| cfe4=   |    | 1.796350 |    |       |    |       |
| cfec4=  |    | 91.006   |    |       |    |       |
| dih4=   |    | 118.548  |    |       |    |       |
| cfe5=   |    | 1.782189 |    |       |    |       |
| cfec5=  |    | 91.193   |    |       |    |       |
| dih5=   |    | -129.299 |    |       |    |       |
| oc6=    |    | 1.145423 |    |       |    |       |
| ocfe6=  |    | 178.687  |    |       |    |       |
| dih6=   |    | 13.793   |    |       |    |       |
| oc7=    |    | 1.145715 |    |       |    |       |
| ocfe7=  |    | 177.901  |    |       |    |       |
| dih7=   |    | -95.465  |    |       |    |       |
| oc8=    |    | 1.151170 |    |       |    |       |
| ocfe8=  |    | 175.507  |    |       |    |       |
| dih8=   |    | -2.218   |    |       |    |       |
| oc9=    |    | 1.153881 |    |       |    |       |
| ocfe9=  |    | 177.495  |    |       |    |       |
| dih9=   |    | -2.920   |    |       |    |       |
| ofe10=  |    | 2.077757 |    |       |    |       |
| ofec10= |    | 107.468  |    |       |    |       |
| dih10=  |    | 179.337  |    |       |    |       |
| col1=   |    | 1.278505 |    |       |    |       |
| cofe11= |    | 82.368   |    |       |    |       |
| dih11=  |    | -179.365 |    |       |    |       |
| cc12=   |    | 1.463023 |    |       |    |       |
| cco12=  |    | 123.876  |    |       |    |       |
| dih12=  |    | 109.560  |    |       |    |       |
| cc13=   |    | 1.352495 |    |       |    |       |
| ccc13=  |    | 122.403  |    |       |    |       |
| dih13=  |    | 9.396    |    |       |    |       |
| cc14=   |    | 1.460561 |    |       |    |       |
| ccc14=  |    | 127.839  |    |       |    |       |
| dih14=  |    | 176.798  |    |       |    |       |
| cc15=   |    | 1.408066 |    |       |    |       |
| ccc15=  |    | 118.591  |    |       |    |       |
| dih15=  |    | -176.831 |    |       |    |       |
| cc16=   |    | 1.392832 |    |       |    |       |
| ccc16=  |    | 121.169  |    |       |    |       |
| dih16=  |    | 179.732  |    |       |    |       |
| cc17=   |    | 1.395591 |    |       |    |       |

ccc17= 119.998  
dih17= -0.003  
cc18= 1.398948  
ccc18= 119.629  
dih18= 0.153  
cc19= 1.390366  
ccc19= 120.375  
dih19= -0.110  
hc20= 1.101256  
hcc20= 115.075  
dih20= -153.871  
hc21= 1.087807  
hcc21= 121.846  
dih21= 1.241  
hc22= 1.089221  
hcc22= 115.616  
dih22= -178.215  
hc23= 1.087352  
hcc23= 119.033  
dih23= 179.859  
hc24= 1.086505  
hcc24= 119.795  
dih24= 179.991  
hc25= 1.086448  
hcc25= 120.116  
dih25= 179.966  
hc26= 1.086636  
hcc26= 119.635  
dih26= 179.994  
hc27= 1.085989  
hcc27= 119.275  
dih27= 179.775

#### **4.6 $\eta^2$ N=C transoid**

fe  
c 1 cfe2  
c 1 cfe3 2 cfec3  
c 1 cfe4 2 cfec4 3 dih4  
c 1 cfe5 2 cfec5 3 dih5  
o 2 oc6 1 ocfe6 5 dih6  
o 3 oc7 1 ocfe7 5 dih7  
o 4 oc8 1 ocfe8 5 dih8  
o 5 oc9 1 ocfe9 4 dih9  
o 1 ofe10 5 ofec10 9 dih10  
c 10 co11 1 cofe11 5 dih11  
c 11 cc12 10 cco12 1 dih12  
c 12 cc13 11 ccc13 10 dih13  
c 13 cc14 12 ccc14 11 dih14  
c 14 cc15 13 ccc15 12 dih15  
c 15 cc16 14 ccc16 13 dih16  
c 16 cc17 15 ccc17 14 dih17

|         |    |          |    |       |    |       |
|---------|----|----------|----|-------|----|-------|
| c       | 17 | cc18     | 16 | ccc18 | 15 | dih18 |
| c       | 14 | cc19     | 15 | ccc19 | 16 | dih19 |
| h       | 11 | hc20     | 12 | hcc20 | 13 | dih20 |
| h       | 12 | hc21     | 13 | hcc21 | 14 | dih21 |
| h       | 13 | hc22     | 14 | hcc22 | 15 | dih22 |
| h       | 15 | hc23     | 16 | hcc23 | 17 | dih23 |
| h       | 16 | hc24     | 15 | hcc24 | 14 | dih24 |
| h       | 17 | hc25     | 16 | hcc25 | 15 | dih25 |
| h       | 18 | hc26     | 19 | hcc26 | 14 | dih26 |
| h       | 19 | hc27     | 14 | hcc27 | 15 | dih27 |
| cfe2=   |    | 1.826197 |    |       |    |       |
| cfe3=   |    | 1.827504 |    |       |    |       |
| cfec3=  |    | 174.895  |    |       |    |       |
| cfe4=   |    | 1.782152 |    |       |    |       |
| cfec4=  |    | 91.386   |    |       |    |       |
| dih4=   |    | -123.650 |    |       |    |       |
| cfe5=   |    | 1.794696 |    |       |    |       |
| cfec5=  |    | 91.204   |    |       |    |       |
| dih5=   |    | 123.044  |    |       |    |       |
| oc6=    |    | 1.146951 |    |       |    |       |
| ocfe6=  |    | 178.525  |    |       |    |       |
| dih6=   |    | 57.729   |    |       |    |       |
| oc7=    |    | 1.146492 |    |       |    |       |
| ocfe7=  |    | 178.161  |    |       |    |       |
| dih7=   |    | -94.866  |    |       |    |       |
| oc8=    |    | 1.154037 |    |       |    |       |
| ocfe8=  |    | 177.606  |    |       |    |       |
| dih8=   |    | 4.572    |    |       |    |       |
| oc9=    |    | 1.151593 |    |       |    |       |
| ocfe9=  |    | 175.421  |    |       |    |       |
| dih9=   |    | -0.534   |    |       |    |       |
| ofe10=  |    | 2.079459 |    |       |    |       |
| ofec10= |    | 106.811  |    |       |    |       |
| dih10=  |    | 179.882  |    |       |    |       |
| col1=   |    | 1.275044 |    |       |    |       |
| cofe11= |    | 84.516   |    |       |    |       |
| dih11=  |    | 178.082  |    |       |    |       |
| cc12=   |    | 1.455542 |    |       |    |       |
| cco12=  |    | 123.517  |    |       |    |       |
| dih12=  |    | 106.065  |    |       |    |       |
| cc13=   |    | 1.352564 |    |       |    |       |
| ccc13=  |    | 121.623  |    |       |    |       |
| dih13=  |    | 168.033  |    |       |    |       |
| cc14=   |    | 1.460087 |    |       |    |       |
| ccc14=  |    | 127.950  |    |       |    |       |
| dih14=  |    | -178.155 |    |       |    |       |
| cc15=   |    | 1.409736 |    |       |    |       |
| ccc15=  |    | 123.143  |    |       |    |       |
| dih15=  |    | 0.009    |    |       |    |       |
| cc16=   |    | 1.390268 |    |       |    |       |
| ccc16=  |    | 120.730  |    |       |    |       |
| dih16=  |    | -179.953 |    |       |    |       |

cc17= 1.399016  
ccc17= 120.364  
dih17= 0.119  
cc18= 1.395593  
ccc18= 119.680  
dih18= -0.074  
cc19= 1.408046  
ccc19= 118.131  
dih19= -0.020  
hc20= 1.103147  
hcc20= 115.504  
dih20= 3.363  
hc21= 1.087061  
hcc21= 122.068  
dih21= -0.740  
hc22= 1.091268  
hcc22= 114.891  
dih22= 179.954  
hc23= 1.085898  
hcc23= 119.308  
dih23= -179.860  
hc24= 1.086582  
hcc24= 119.644  
dih24= -179.928  
hc25= 1.086393  
hcc25= 120.110  
dih25= 179.903  
hc26= 1.086527  
hcc26= 119.832  
dih26= -179.797  
hc27= 1.087538  
hcc27= 119.087  
dih27= 179.967

#### 4.7 $\sigma^2$ N cisoid

fe  
c 1 cfe2  
c 1 cfe3 2 cfec3  
c 1 cfe4 3 cfec4 2 dih4  
c 1 cfe5 4 cfec5 3 dih5  
o 2 oc6 1 ocfe6 5 dih6  
o 3 oc7 1 ocfe7 5 dih7  
o 4 oc8 1 ocfe8 5 dih8  
o 5 oc9 1 ocfe9 2 dih9  
o 1 ofe10 5 ofec10 9 dih10  
c 10 co11 1 cofe11 5 dih11  
c 11 cc12 10 cco12 1 dih12  
c 12 cc13 11 ccc13 10 dih13  
c 13 cc14 12 ccc14 11 dih14  
c 14 cc15 13 ccc15 12 dih15  
c 15 cc16 14 ccc16 13 dih16

|         |    |      |    |          |    |       |
|---------|----|------|----|----------|----|-------|
| c       | 16 | cc17 | 15 | ccc17    | 14 | dih17 |
| c       | 17 | cc18 | 16 | ccc18    | 15 | dih18 |
| c       | 18 | cc19 | 17 | ccc19    | 16 | dih19 |
| h       | 11 | hc20 | 12 | hcc20    | 13 | dih20 |
| h       | 12 | hc21 | 13 | hcc21    | 14 | dih21 |
| h       | 13 | hc22 | 14 | hcc22    | 19 | dih22 |
| h       | 15 | hc23 | 14 | hcc23    | 19 | dih23 |
| h       | 16 | hc24 | 15 | hcc24    | 14 | dih24 |
| h       | 17 | hc25 | 18 | hcc25    | 19 | dih25 |
| h       | 18 | hc26 | 19 | hcc26    | 14 | dih26 |
| h       | 19 | hc27 | 18 | hcc27    | 17 | dih27 |
| cfe2=   |    |      |    | 1.768608 |    |       |
| cfe3=   |    |      |    | 1.805269 |    |       |
| cfec3=  |    |      |    | 90.862   |    |       |
| cfe4=   |    |      |    | 1.805200 |    |       |
| cfec4=  |    |      |    | 123.574  |    |       |
| dih4=   |    |      |    | -91.687  |    |       |
| cfe5=   |    |      |    | 1.827000 |    |       |
| cfec5=  |    |      |    | 118.118  |    |       |
| dih5=   |    |      |    | 176.193  |    |       |
| oc6=    |    |      |    | 1.153290 |    |       |
| ocfe6=  |    |      |    | 179.580  |    |       |
| dih6=   |    |      |    | 176.134  |    |       |
| oc7=    |    |      |    | 1.156235 |    |       |
| ocfe7=  |    |      |    | 179.403  |    |       |
| dih7=   |    |      |    | -47.294  |    |       |
| oc8=    |    |      |    | 1.156190 |    |       |
| ocfe8=  |    |      |    | 179.365  |    |       |
| dih8=   |    |      |    | 51.524   |    |       |
| oc9=    |    |      |    | 1.151872 |    |       |
| ocfe9=  |    |      |    | 179.402  |    |       |
| dih9=   |    |      |    | 179.606  |    |       |
| ofe10=  |    |      |    | 2.070689 |    |       |
| ofec10= |    |      |    | 85.306   |    |       |
| dih10=  |    |      |    | -0.334   |    |       |
| coll1=  |    |      |    | 1.239983 |    |       |
| cofe11= |    |      |    | 144.716  |    |       |
| dih11=  |    |      |    | 179.689  |    |       |
| cc12=   |    |      |    | 1.447185 |    |       |
| cco12=  |    |      |    | 129.821  |    |       |
| dih12=  |    |      |    | 0.273    |    |       |
| cc13=   |    |      |    | 1.359074 |    |       |
| ccc13=  |    |      |    | 124.901  |    |       |
| dih13=  |    |      |    | -0.019   |    |       |
| cc14=   |    |      |    | 1.454802 |    |       |
| ccc14=  |    |      |    | 127.472  |    |       |
| dih14=  |    |      |    | 179.815  |    |       |
| cc15=   |    |      |    | 1.409375 |    |       |
| ccc15=  |    |      |    | 118.057  |    |       |
| dih15=  |    |      |    | -179.734 |    |       |
| cc16=   |    |      |    | 1.391866 |    |       |
| ccc16=  |    |      |    | 120.931  |    |       |

dih16= 179.886  
cc17= 1.395902  
ccc17= 119.843  
dih17= 0.017  
cc18= 1.399962  
ccc18= 119.997  
dih18= 0.010  
cc19= 1.389166  
ccc19= 120.226  
dih19= -0.019  
hc20= 1.102557  
hcc20= 114.620  
dih20= -179.965  
hc21= 1.087205  
hcc21= 120.978  
dih21= -0.108  
hc22= 1.086807  
hcc22= 115.352  
dih22= -179.890  
hc23= 1.086913  
hcc23= 119.090  
dih23= -179.995  
hc24= 1.086023  
hcc24= 119.907  
dih24= -179.983  
hc25= 1.086351  
hcc25= 119.949  
dih25= 179.994  
hc26= 1.086281  
hcc26= 119.803  
dih26= 179.995  
hc27= 1.085662  
hcc27= 119.404  
dih27= -179.994

#### **4.8 $\sigma^2$ N transoid**

fe  
c 1 cfe2  
c 1 cfe3 2 cfec3  
c 1 cfe4 3 cfec4 2 dih4  
c 1 cfe5 4 cfec5 3 dih5  
o 2 oc6 1 ocfe6 5 dih6  
o 3 oc7 1 ocfe7 5 dih7  
o 4 oc8 1 ocfe8 5 dih8  
o 5 oc9 1 ocfe9 2 dih9  
o 1 ofe10 5 ofec10 9 dih10  
c 10 co11 1 cofe11 5 dih11  
c 11 cc12 10 cco12 1 dih12  
c 12 cc13 11 ccc13 10 dih13  
c 13 cc14 12 ccc14 11 dih14  
c 14 cc15 13 ccc15 12 dih15

|         |    |      |    |          |    |       |
|---------|----|------|----|----------|----|-------|
| c       | 15 | cc16 | 14 | ccc16    | 13 | dih16 |
| c       | 16 | cc17 | 15 | ccc17    | 14 | dih17 |
| c       | 17 | cc18 | 16 | ccc18    | 15 | dih18 |
| c       | 14 | cc19 | 15 | ccc19    | 16 | dih19 |
| h       | 11 | hc20 | 12 | hcc20    | 13 | dih20 |
| h       | 12 | hc21 | 13 | hcc21    | 14 | dih21 |
| h       | 13 | hc22 | 14 | hcc22    | 15 | dih22 |
| h       | 15 | hc23 | 16 | hcc23    | 17 | dih23 |
| h       | 16 | hc24 | 15 | hcc24    | 14 | dih24 |
| h       | 17 | hc25 | 16 | hcc25    | 15 | dih25 |
| h       | 18 | hc26 | 19 | hcc26    | 14 | dih26 |
| h       | 19 | hc27 | 14 | hcc27    | 15 | dih27 |
| cfe2=   |    |      |    | 1.770227 |    |       |
| cfe3=   |    |      |    | 1.804602 |    |       |
| cfec3=  |    |      |    | 91.174   |    |       |
| cfe4=   |    |      |    | 1.804522 |    |       |
| cfec4=  |    |      |    | 122.004  |    |       |
| dih4=   |    |      |    | -92.113  |    |       |
| cfe5=   |    |      |    | 1.822968 |    |       |
| cfec5=  |    |      |    | 118.851  |    |       |
| dih5=   |    |      |    | 175.829  |    |       |
| oc6=    |    |      |    | 1.153349 |    |       |
| ocfe6=  |    |      |    | 179.899  |    |       |
| dih6=   |    |      |    | 134.110  |    |       |
| oc7=    |    |      |    | 1.156684 |    |       |
| ocfe7=  |    |      |    | 179.329  |    |       |
| dih7=   |    |      |    | -83.061  |    |       |
| oc8=    |    |      |    | 1.156664 |    |       |
| ocfe8=  |    |      |    | 179.239  |    |       |
| dih8=   |    |      |    | 84.103   |    |       |
| oc9=    |    |      |    | 1.152572 |    |       |
| ocfe9=  |    |      |    | 179.331  |    |       |
| dih9=   |    |      |    | -175.800 |    |       |
| ofe10=  |    |      |    | 2.068557 |    |       |
| ofec10= |    |      |    | 85.460   |    |       |
| dih10=  |    |      |    | 4.173    |    |       |
| col1=   |    |      |    | 1.240058 |    |       |
| cofe11= |    |      |    | 133.340  |    |       |
| dih11=  |    |      |    | 179.777  |    |       |
| cc12=   |    |      |    | 1.439975 |    |       |
| cco12=  |    |      |    | 126.878  |    |       |
| dih12=  |    |      |    | 0.137    |    |       |
| cc13=   |    |      |    | 1.357726 |    |       |
| ccc13=  |    |      |    | 119.440  |    |       |
| dih13=  |    |      |    | -179.989 |    |       |
| cc14=   |    |      |    | 1.454558 |    |       |
| ccc14=  |    |      |    | 128.094  |    |       |
| dih14=  |    |      |    | 179.954  |    |       |
| cc15=   |    |      |    | 1.410487 |    |       |
| ccc15=  |    |      |    | 122.875  |    |       |
| dih15=  |    |      |    | -0.052   |    |       |
| cc16=   |    |      |    | 1.389266 |    |       |



|        |          |
|--------|----------|
| ccc16= | 120.471  |
| dih16= | -179.927 |
| cc17=  | 1.399548 |
| ccc17= | 120.258  |
| dih17= | -0.006   |
| cc18=  | 1.396067 |
| ccc18= | 120.015  |
| dih18= | -0.009   |
| cc19=  | 1.408927 |
| ccc19= | 118.528  |
| dih19= | 0.016    |
| hc20=  | 1.102822 |
| hcc20= | 116.581  |
| dih20= | -0.016   |
| hc21=  | 1.084743 |
| hcc21= | 123.089  |
| dih21= | -0.044   |
| hc22=  | 1.091323 |
| hcc22= | 114.861  |
| dih22= | 179.927  |
| hc23=  | 1.085462 |
| hcc23= | 119.475  |
| dih23= | -179.997 |
| hc24=  | 1.086051 |
| hcc24= | 119.744  |
| dih24= | -179.996 |
| hc25=  | 1.086212 |
| hcc25= | 119.941  |
| dih25= | -179.992 |
| hc26=  | 1.086105 |
| hcc26= | 119.987  |
| dih26= | -179.987 |
| hc27=  | 1.087288 |
| hcc27= | 119.228  |
| dih27= | -179.986 |

**End of file**
